# Supplementary material for: A novel fatty acid metabolism-related gene prognostic signature and candidate drugs for patients with hepatocellular carcinoma
Source: PeerJ. 2023 Jan 6;11:e14622. doi: 10.7717/peerj.14622 (PMC9828273; doi:10.7717/peerj.14622)
Supplement: Supplemental Information 2 [file peerj-11-14622-s002.xlsx]

## Sheet:  Table S1
Table S1. Fatty acid metabolism-related genes and the common genes in TCGA and GEO cohorts
309 fatty acid metabolism-related genes	137 common genes
FADS2	FADS2
RAP1GDS1	ALDH2
SDHA	ACSBG1
ALDH2	HSD17B3
ACSBG1	PTGES2
HSD17B4	CBR1
HACD1	CD1D
HSD17B3	PTGES
PTGES2	ACAA2
DLD	CD36
CBR1	ELOVL2
ADIPOR2	ALOX15B
HPGD	PON1
CD1D	MDH1
ERP29	PPT2
PTGES	GPX1
AADAT	ENO3
PDHA1	CEL
ACAA2	MORC2
ACSF3	SDHC
MAOA	CYP2C9
PRDX6	ADH1A
CD36	SLC25A1
PRKAG2	EHHADH
ACADVL	ACACA
ELOVL2	ACAA1
ALOX15B	CA4
PON1	OLAH
MDH1	PRKAA2
PECR	ACOT7
PPT2	ACOT8
GPX1	ABCD1
ENO3	ACSL3
ACBD4	GLUL
CA6	ACOT9
CEL	NCAPH2
CYP4F8	CYP1B1
ACBD6	FADS1
MORC2	HMGCS2
SDHC	IDH3G
UBE2L6	ALOX15
CYP2C9	MECR
CYP4A22	HSPH1
ADH1A	MID1IP1
DPEP3	ALDH1B1
ACBD5	PPARD
AWAT1	ABCC1
ALOXE3	GPD1
SLC25A1	CYP2C8
EHHADH	ACOXL
ACACA	CBR3
ALDH1A1	PTGES3
ACAA1	LTA4H
CA4	BLVRA
OLAH	CYP1A2
PRKAA2	GCDH
ACOT7	PON3
ACOT8	TDO2
ABCD1	ACADS
ACSL3	YWHAH
GLUL	EPHX1
ACOT9	ACSBG2
NCAPH2	ALDH3A1
ADH5	ME1
HACD2	FASN
OSTC	DPEP1
CYP1B1	GPX2
CYP4F22	AKR1C3
FADS1	MAPKAPK2
HMGCS2	ODC1
IDH3G	ELOVL4
ALOX15	CA2
MECR	UROS
CPOX	CYP2C19
HSD17B11	ACADM
ACSM6	ADH6
HACD4	ACADSB
FAAH	ACSL1
CYP2U1	ACAT1
NTHL1	G0S2
MIX23	ELOVL1
SDHD	NSDHL
HSPH1	FMO1
KMT5A	GPX4
MID1IP1	ECHS1
ALDH1B1	GSTZ1
PPARD	IDH3B
HTD2	GRHPR
SUCLA2	ETFDH
ADH4	ACSM3
UROD	SCP2
PTGDS	SLC22A5
HADHA	SMS
ABCC1	ELOVL5
PTGR1	ALDOA
DHCR24	VNN1
HCCS	CYP4B1
FABP2	ACO2
GPD1	UGDH
PHYH	MDH2
CYP2C8	PPT1
ECI1	EPHX2
CYP2J2	PON2
RXRA	PSME1
THEM4	PTGS2
FABP1	PTPRG
PDHB	HAO2
PTGR2	SLC27A3
ACOXL	ACLY
NDUFAB1	HMGCS1
CBR3	METAP1
MCEE	APEX1
PTGES3	MIF
CRYZ	ADSL
PCTP	SCD
THEM5	RDH16
CPT1B	ACSL6
LTA4H	ACSL4
CYP8B1	AQP7
ADH1C	ACADL
HSD17B8	PTGIS
BLVRA	HMGCL
SUCLG2	ADH1B
THRSP	CYP4F2
ACOX3	IDI1
ECH1	ALOX12
CYP1A2	NBN
GCDH	LGALS1
ELOVL3	SLC27A2
PON3	HSP90AA1
TDO2	MLYCD
ACADS	BCKDHB
SCD5	CPT2
YWHAH	GPD2
GGT5	S100A10
TBXAS1	CYP4A11
AMACR	PRKAB2
PCCA
ACOT11
PTGS1
EPHX1
ACSBG2
ACSF2
ALDH3A1
ME1
FASN
DPEP1
GPX2
GAD2
AKR1C3
CYP4F3
MAPKAPK2
CBR4
MCAT
ODC1
ALAD
CIDEA
ELOVL4
CA2
RDH11
AOC3
GGT1
UROS
CYP2C19
LDHA
ACADM
ACOT13
HADHB
ADH6
ACADSB
ACSL1
ACAT1
G0S2
ELOVL1
CROT
GABARAPL1
ALOX5AP
NSDHL
FMO1
ACAT2
ALOX5
PTS
TECRL
GPX4
CPT1A
FAAH2
ECHS1
GSTZ1
ACSS1
HACD3
IDH3B
GRHPR
FH
ETFDH
ACSM3
PLA2G4A
ACAD10
HADH
ACBD7
SCP2
AUH
D2HGDH
SLC22A5
H2AZ1
SMS
XIST
ALOX12B
ELOVL5
NUDT7
ALDOA
VNN1
CYP4B1
MMUT
ACO2
UGDH
HSD17B12
MDH2
PPT1
DPEP2
EPHX2
ACOT6
PON2
PSME1
ACOT4
PTGS2
PTPRG
HAO2
ACOT2
SLC27A3
SERINC1
DLST
HSD17B10
ACLY
TECR
HMGCS1
ECI2
BPHL
METAP1
APEX1
ELOVL6
MIF
RETSAT
NUDT19
HPGDS
HSDL2
ADSL
PCCB
ACSL5
SCD
RDH16
PRXL2B
DECR2
SLC25A20
ACOX1
ACSL6
ACSL4
AQP7
IL4I1
ACADL
PTGIS
ALDH3A2
REEP6
HMGCL
ALDH7A1
ACAD11
INMT
ACACB
CPT1C
CYP4F11
ADH1B
ACOX2
DECR1
ENO2
CYP4F2
IDI1
ALDH9A1
HIBCH
LTC4S
ELOVL7
ALOX12
MMAA
NBN
LGALS1
GAPDHS
MGLL
SLC27A2
PPARA
HSP90AA1
MLYCD
CYP1A1
PCBD1
SLC25A17
BCKDHB
DBI
SUCLG1
CPT2
ACOT12
HACL1
ADH7
GPD2
TP53INP2
IDH1
S100A10
CRAT
HSD17B7
CYP4A11
ACOT1
PRKAB2
BMPR1B

## Sheet: Table S2
Table S2. The primes used in the study
Gene	Forward (5′-3′)			Reverse (5′-3′)
PON-1	TTTAATCCAGAGCTAATGAAAGCC			GAAGAGTGATGTATAGCCCCAG
CYP2C9	TTTCCCTGACTTCTGTGCTACAT			CTGGAGTGGTGTCAAGGTTCTTT
ACACA	TCGCTTTGGGGGAAATAAAGTG			ACCACCTACGGATAGACCGC
ACADS	TGCCATGCTGAAGGATAACAAGA			CATCTCTGTCACGTAGCCCATG
ME1	TTCCTATGTGTTCCCTGGAGTTG			CCGACCCTCTTCCAAGTGTTTAT
ACAT1	ATGCCAGTACACTGAATGATGG			GATGCAGCATATACAGGAGCAA
ELOVL1	CCAAGGTCAAGGCCAACTGA			CTGACGGACACTGCCCTAAG
SMS	AGACGGAGGCATATTGTGTGAAA			ATTCTCTCCCTTCTTTGGCGTAC
UGDH	GGAGCTGATGTAGAAGAGGTAGC			CCTCCTCCTCTGGTAGTCATTCA
ADSL	TCTTTCACTGGTCGTGCCTC			TCTGCTTTCACCTTCATCACG
HSP90AA1	GGACCAGAAATCCCGACGATATT			AGCTCCTCACAGTTATCCATGAT
S100A10	GGCTACTTAACAAAGGAGGACC			GAGGCCCGCAATTAGGGAAA
GAPDH	TGACTTCAACAGCGACACCCA			CACCCTGTTGCTGTAGCCAAA

## Sheet: Table S3
Table S3. Differential expressed fatty acid metabolism-related genes in TCGA database
gene	conMean	treatMean	logFC	pValue	fdr
CYP2C19	3.08534	0.382142	-3.01325	3.18877e-17	1.72831e-16
CYP1A2	162.061	24.7981	-2.70823	4.83407e-24	1.00772e-22
AADAT	11.0373	2.43165	-2.18237	7.4399e-26	4.03242e-24
CYP2C8	449.462	100.575	-2.15993	6.03826e-26	4.03242e-24
INMT	9.65272	2.5074	-1.94474	7.33205e-21	7.09638e-20
ADH4	804.751	228.026	-1.81934	8.52887e-21	7.70442e-20
HAO2	86.8434	25.3486	-1.77651	1.5757e-20	1.33442e-19
PTGS2	0.685695	0.20982	-1.70841	5.30649e-17	2.71332e-16
CYP4A11	233.062	72.5975	-1.68272	1.82367e-24	4.11845e-23
CYP4A22	60.5278	19.749	-1.61582	1.1666e-20	1.01984e-19
RDH16	121.454	43.3529	-1.48621	1.45415e-19	1.12593e-18
GSTZ1	11.8196	4.28754	-1.46296	2.84188e-21	3.08059e-20
ACSM3	8.26917	3.08038	-1.42463	3.51111e-21	3.65965e-20
CYP2C9	287.583	118.382	-1.28053	2.01827e-17	1.13948e-16
TDO2	85.23	35.608	-1.25916	2.04549e-15	8.15189e-15
ADH1B	527.994	221.134	-1.2556	3.38281e-17	1.79753e-16
ADH1A	388.21	164.851	-1.23568	5.64967e-17	2.8353e-16
ACSL1	181.093	77.8892	-1.21723	8.80493e-18	5.30252e-17
ACADS	72.1009	32.0587	-1.1693	9.34512e-22	1.1011e-20
ACADSB	72.1887	32.7757	-1.13915	1.4619e-18	9.90438e-18
ALDH2	154.926	71.3477	-1.11864	1.46845e-22	1.98975e-21
ACAD11	0.674515	0.314301	-1.1017	7.75983e-15	2.92071e-14
ETFDH	23.2411	10.9109	-1.0909	8.19759e-22	1.00979e-20
ENO3	15.2563	7.19152	-1.08504	1.04763e-13	3.42056e-13
GPD1	36.754	17.6985	-1.05427	4.63164e-13	1.44273e-12
CYP4F2	60.3235	29.4684	-1.03355	6.20531e-15	2.40234e-14
ADH1C	476.144	233.436	-1.02837	1.13701e-12	3.27249e-12
CD1D	5.08073	2.52613	-1.00811	3.35023e-15	1.31581e-14
THRSP	87.3375	43.4787	-1.00629	9.25971e-13	2.75756e-12
ACAA2	105.504	52.7551	-0.999921	5.19135e-20	4.2632e-19
CYP8B1	135.263	68.2335	-0.987219	2.21136e-11	5.3507e-11
PON3	60.3309	30.9882	-0.961178	5.40702e-16	2.32588e-15
ACAA1	48.7472	25.2072	-0.951483	4.87902e-18	3.14813e-17
EPHX2	46.3274	24.0033	-0.948633	3.56515e-17	1.85799e-16
ADH6	89.8084	46.9776	-0.934878	6.32803e-14	2.09134e-13
PTGIS	2.19195	1.16676	-0.909703	2.4127e-14	8.49144e-14
G0S2	183.044	97.8567	-0.903446	2.98105e-07	5.14563e-07
BCKDHB	12.4327	6.66998	-0.898383	6.18194e-18	3.89606e-17
ACADL	4.06061	2.25082	-0.851246	6.55298e-12	1.74104e-11
PON1	171.792	96.3879	-0.833735	1.7177e-11	4.27062e-11
VNN1	72.3392	40.9309	-0.821586	8.46623e-10	1.76488e-09
ACAT1	82.9427	47.2413	-0.812067	2.12108e-16	9.91057e-16
SLC27A2	83.4314	48.4008	-0.785559	8.70074e-12	2.26721e-11
GGT5	7.3287	4.29013	-0.772534	1.14718e-12	3.27249e-12
SCP2	75.6229	44.3779	-0.768981	8.62074e-13	2.5958e-12
GCDH	24.6912	14.7901	-0.739366	2.94961e-12	8.07418e-12
ALDH1B1	67.6148	40.6337	-0.734662	5.75254e-11	1.3556e-10
MMUT	46.1251	27.9651	-0.721926	8.71709e-15	3.19234e-14
HMGCL	40.4827	24.5905	-0.719208	2.52386e-16	1.13994e-15
EHHADH	68.1732	41.9122	-0.701835	2.39251e-10	5.31451e-10
CA2	43.5161	27.0536	-0.685731	1.63395e-13	5.2094e-13
MLYCD	2.48341	1.54741	-0.682465	8.54984e-15	3.17398e-14
ACADM	31.8794	20.1171	-0.664199	2.06757e-11	5.09373e-11
AQP7	2.95072	1.8863	-0.645505	3.66883e-12	9.84408e-12
ACOT12	21.4536	13.7177	-0.645176	9.38466e-09	1.74195e-08
ECHS1	468.982	301.235	-0.638642	5.40125e-13	1.66334e-12
GRHPR	62.9093	40.6578	-0.629744	9.97617e-12	2.5748e-11
CPT2	25.1463	16.4624	-0.611169	2.47551e-12	6.84554e-12
HMGCS2	664.917	435.864	-0.609294	5.83177e-10	1.22512e-09
MMAA	3.16959	2.11011	-0.586976	5.39454e-14	1.8274e-13
PTGR2	1.37854	2.08663	0.59803	3.86894e-11	9.27861e-11
UROS	3.9322	6.10374	0.634357	8.59391e-11	1.99056e-10
D2HGDH	3.75891	5.8461	0.637159	1.99461e-08	3.62777e-08
METAP1	4.0556	6.34216	0.645059	2.59076e-10	5.70809e-10
SLC25A1	60.6036	95.1702	0.651107	9.80311e-10	2.02797e-09
HMGCS1	26.2654	41.551	0.661721	0.000113855	0.000168604
MDH1	20.854	33.1732	0.669694	3.56194e-14	1.23755e-13
GPX4	118.536	188.694	0.670725	1.27932e-10	2.9381e-10
SDHC	6.06381	9.83354	0.697487	7.17994e-15	2.74051e-14
HACD3	13.7758	22.5761	0.712659	7.85041e-12	2.0655e-11
KMT5A	1.98585	3.27258	0.720676	1.47517e-11	3.73619e-11
ACO2	12.5296	20.8309	0.733386	3.45575e-08	6.20204e-08
MECR	2.82548	4.69884	0.733806	1.30649e-17	7.69693e-17
CYP4B1	0.024571	0.0413251	0.750062	0.000260383	0.000366321
CBR1	58.7804	99.2111	0.755166	0.00174612	0.00230829
MDH2	46.9343	79.5019	0.760348	6.88772e-16	2.91652e-15
ACSL3	6.99338	11.8657	0.762736	6.236e-09	1.19855e-08
LTA4H	4.31542	7.32984	0.764278	1.35407e-18	9.40907e-18
NUDT19	2.70527	4.65052	0.781622	7.4341e-09	1.40884e-08
PSME1	64.1974	110.433	0.782587	2.25543e-16	1.03597e-15
NBN	3.48574	6.08118	0.802888	1.33247e-11	3.4066e-11
ELOVL5	16.4651	28.8252	0.807921	5.00018e-09	9.74856e-09
TECR	12.8618	22.6106	0.813905	3.07749e-17	1.70204e-16
ACOT7	4.04337	7.12035	0.81639	5.47867e-10	1.15994e-09
GPX1	124.117	222.307	0.840857	1.76559e-10	4.0208e-10
UGDH	22.7364	41.0383	0.85197	0.000206002	0.000298537
IDH3B	15.3958	27.9469	0.860155	1.57541e-21	1.7789e-20
HACD2	9.33163	16.9642	0.862291	2.82003e-08	5.09485e-08
ODC1	18.193	33.2914	0.871766	1.64563e-08	3.03377e-08
SCD	186.315	344.506	0.886787	0.028502	0.0330087
IDI1	21.8482	40.9373	0.905901	2.76083e-10	6.03374e-10
SMS	10.6993	20.1124	0.910563	7.48335e-17	3.68725e-16
ACOT9	2.03776	3.92143	0.944395	1.36327e-17	7.86054e-17
ACOT8	3.06817	5.91845	0.947843	1.12405e-22	1.60325e-21
NSDHL	11.7044	22.658	0.952976	3.99002e-14	1.36873e-13
PPT1	9.41631	18.2855	0.95747	2.2091e-10	4.98889e-10
MID1IP1	11.1261	21.8632	0.974558	5.65503e-08	1.00164e-07
EPHX1	524.417	1035.6	0.981681	7.87807e-06	1.24125e-05
ELOVL2	12.1802	24.1332	0.986486	0.000210039	0.000302769
APEX1	28.0854	57.5603	1.03526	1.71176e-24	4.11845e-23
YWHAH	18.1572	37.2992	1.03861	6.80904e-18	4.19375e-17
PPARD	3.89903	8.03016	1.04231	1.51313e-11	3.79683e-11
PPT2	1.89651	3.92074	1.04778	3.7001e-10	7.95815e-10
IDH3G	8.88894	18.4716	1.05523	3.10786e-23	4.9543e-22
FADS2	9.64211	20.0576	1.05673	0.0111863	0.0137172
HSP90AA1	68.1895	141.95	1.05776	6.55148e-19	4.67224e-18
PTGES3	34.5621	72.21	1.06301	5.03779e-25	1.51693e-23
SLC27A3	6.23711	13.0369	1.06365	1.99877e-06	3.30284e-06
ADSL	3.823	8.44466	1.14333	6.0313e-24	1.16749e-22
PON2	20.7885	46.3985	1.15829	2.85268e-16	1.26734e-15
HSD17B7	2.15274	4.93936	1.19815	2.15223e-14	7.67441e-14
PTGES2	7.21658	16.7167	1.21191	8.10047e-22	1.00979e-20
GPD2	0.76499	1.77479	1.21413	1.93505e-12	5.40617e-12
MAPKAPK2	12.2665	28.5069	1.21659	8.52887e-21	7.70442e-20
MORC2	2.5697	6.14113	1.2569	3.6553e-25	1.40792e-23
CD36	3.14725	7.61252	1.27428	0.0439476	0.0496241
MIF	18.5365	45.6984	1.30177	2.78293e-13	8.76946e-13
PRKAB2	5.71829	14.0982	1.30186	9.78823e-16	4.01911e-15
THEM4	1.69083	4.18615	1.30789	1.04319e-24	2.82705e-23
HTD2	0.00715924	0.0177353	1.30874	1.04881e-05	1.63349e-05
GPX2	106.985	267.704	1.32323	0.0100979	0.0124388
HSPH1	2.87153	7.21862	1.32991	2.54747e-19	1.86585e-18
ALOX12	0.109011	0.275266	1.33635	1.04005e-12	3.03067e-12
LGALS1	43.453	110.703	1.34916	3.01603e-09	6.0544e-09
FADS1	4.64833	12.2544	1.39852	4.00717e-06	6.38791e-06
ELOVL1	8.09535	22.1614	1.45288	2.75088e-26	2.48496e-24
SLC22A5	0.373483	1.02677	1.459	1.69614e-23	2.87283e-22
PTPRG	0.929671	2.60096	1.48425	1.16025e-15	4.69296e-15
ACACA	1.39372	3.91956	1.49175	6.37073e-20	5.07785e-19
NCAPH2	4.85879	14.1173	1.53879	1.20384e-25	5.43736e-24
ACSS1	0.750883	2.27323	1.59808	1.26976e-05	1.95514e-05
PRXL2B	2.12184	6.4345	1.60051	8.65381e-17	4.18782e-16
ABCD1	2.72137	8.41807	1.62916	5.04799e-21	5.06669e-20
ACOXL	0.00808749	0.0253471	1.64806	9.08658e-05	0.000136804
FASN	26.7646	84.1738	1.65305	1.74057e-12	4.91349e-12
CPT1C	0.112498	0.356504	1.66402	1.18204e-13	3.81349e-13
ME1	2.64451	8.41013	1.66913	0.000433795	0.000599788
CPT1B	0.121235	0.39859	1.7171	1.73562e-14	6.27136e-14
ACLY	5.90573	19.5796	1.72916	4.15622e-25	1.40792e-23
ABCC1	0.707154	2.38037	1.75109	3.82189e-06	6.12859e-06
ACBD6	1.26309	4.26919	1.75701	3.40058e-28	9.21556e-26
HSD17B3	0.371757	1.257	1.75756	7.82384e-09	1.4724e-08
ALDOA	20.5536	72.1275	1.81116	2.08274e-19	1.56784e-18
H2AZ1	12.3352	45.2605	1.87548	2.28805e-26	2.48496e-24
BLVRA	3.27671	12.0796	1.88226	5.92585e-14	1.9826e-13
S100A10	25.4133	95.7894	1.91428	1.87944e-18	1.24226e-17
ACSL6	0.261777	1.02016	1.96238	0.0354603	0.0408925
ACSM6	0.00691936	0.0293582	2.08505	9.68832e-05	0.00014426
ALOX15	0.0219052	0.096189	2.1346	8.16438e-06	1.27893e-05
CYP1B1	1.33792	5.9497	2.15283	0.0069287	0.00869296
IL4I1	0.408676	1.90042	2.21729	4.62869e-08	8.25247e-08
AKR1C3	17.683	83.414	2.23793	1.18324e-23	2.13772e-22
ACBD7	0.0287249	0.146302	2.34857	4.88159e-09	9.65628e-09
THEM5	0.689079	3.58228	2.37814	3.64734e-23	5.49127e-22
ELOVL4	0.0372148	0.196794	2.40274	0.000217645	0.000312073
OLAH	0.00931681	0.0534095	2.51919	0.00354048	0.00454725
PRKAA2	0.279372	1.62845	2.54324	2.29901e-10	5.14901e-10
CBR3	0.238376	1.43238	2.5871	8.94401e-16	3.72897e-15
ACSL4	7.32149	46.1219	2.65524	3.57418e-12	9.68603e-12
GLUL	58.1799	366.945	2.65697	0.000190569	0.000277657
ACSBG1	0.00824257	0.0537451	2.70497	2.42743e-05	3.71658e-05
ACSBG2	0.00315317	0.0233909	2.89107	7.20634e-13	2.19429e-12
FMO1	0.209437	1.62117	2.95245	0.00398112	0.00506518
DPEP1	0.118261	0.943304	2.99575	0.00680191	0.00861364
ELOVL3	0.0287553	0.263996	3.19861	1.63748e-06	2.73924e-06
PTGES	0.297396	3.20095	3.42804	0.0147977	0.0177441
ALOX15B	0.142067	1.81789	3.67762	7.72369e-07	1.31643e-06
CA4	0.0420767	0.569383	3.7583	5.34368e-07	9.16542e-07
CEL	0.0337833	0.531242	3.97499	3.69765e-16	1.61623e-15
ALDH3A1	0.752937	44.08	5.87145	0.000343499	0.000479836

## Sheet: Table S4
Table S4. Overall survival-related genes
Gene	HR	HR.95L	HR.95H	pvalue
ALDH2	0.689007	0.574703	0.826046	5.70238e-05
PON1	0.830765	0.764275	0.903039	1.32312e-05
MORC2	1.64888	1.18313	2.29798	0.00314815
CYP2C9	0.846376	0.782752	0.915171	2.87442e-05
ADH1A	0.887644	0.819333	0.961649	0.00353325
ACACA	1.68977	1.25417	2.27666	0.000562908
ACOT7	1.57859	1.21924	2.04386	0.000531987
ACOT8	1.58488	1.14378	2.19609	0.00565409
ACSL3	1.43347	1.1407	1.80138	0.00200609
ACOT9	1.64489	1.19872	2.25714	0.00205165
NCAPH2	1.57065	1.15579	2.13441	0.00391131
HMGCS2	0.866224	0.796531	0.942014	0.000791372
HSPH1	1.51766	1.16838	1.97136	0.00177133
MID1IP1	1.34006	1.11252	1.61413	0.00204916
ABCC1	1.4135	1.17175	1.70512	0.000299056
PTGES3	1.9743	1.34629	2.89525	0.000497278
GCDH	0.729999	0.593935	0.897233	0.00278678
PON3	0.843661	0.747671	0.951974	0.00580508
ACADS	0.674892	0.527202	0.863955	0.00180551
YWHAH	1.63012	1.25578	2.11605	0.0002416
ME1	1.2615	1.1058	1.43913	0.000547625
AKR1C3	1.28985	1.08288	1.53639	0.00434235
MAPKAPK2	1.58674	1.15321	2.18324	0.004576
ODC1	1.31532	1.10886	1.56022	0.00165456
ACAT1	0.691474	0.57357	0.833615	0.000109777
ELOVL1	2.00416	1.49114	2.6937	4.05997e-06
ECHS1	0.699363	0.550112	0.889106	0.00350417
GRHPR	0.772962	0.637775	0.936805	0.00865209
SMS	1.98723	1.56695	2.52023	1.47231e-08
ALDOA	1.35513	1.16782	1.57248	6.22865e-05
UGDH	1.28811	1.08624	1.5275	0.00360154
PPT1	1.65747	1.31679	2.08628	1.67619e-05
ACLY	1.49355	1.15815	1.92607	0.00199166
METAP1	1.57705	1.15061	2.16154	0.00462372
APEX1	1.73766	1.24657	2.42219	0.00111195
ADSL	1.93313	1.46786	2.54586	2.70391e-06
RDH16	0.858193	0.786664	0.936226	0.000573042
ADH1B	0.885208	0.822412	0.9528	0.00116275
NBN	1.45248	1.09683	1.92346	0.00918781
HSP90AA1	1.64127	1.24295	2.16725	0.000477006
GPD2	2.12192	1.50046	3.00079	2.09195e-05
S100A10	1.32985	1.13771	1.55444	0.000342977

## Sheet: Table S5
Table S5. Genes used to build the prediction model
Gene	HR	HR.95L	HR.95H	pvalue	Coef
PON1	0.830765	0.764275	0.903039	1.32e-05	-0.05089
CYP2C9	0.846376	0.782752	0.915171	2.87e-05	-0.02249
ACACA	1.68977	1.25417	2.27666	0.000563	0.08121
ACADS	0.674892	0.527202	0.863955	0.001806	-0.00019
ME1	1.2615	1.1058	1.43913	0.000548	0.061916
ACAT1	0.691474	0.57357	0.833615	0.00011	-0.01438
ELOVL1	2.00416	1.49114	2.6937	4.06e-06	0.085953
SMS	1.98723	1.56696	2.52023	1.47e-08	0.257433
UGDH	1.28811	1.08624	1.5275	0.003602	0.003304
ADSL	1.93312	1.46786	2.54586	2.7e-06	0.050562
HSP90AA1	1.64127	1.24295	2.16725	0.000477	0.080923
S100A10	1.32985	1.13771	1.55444	0.000343	0.036042

## Sheet: Table S6
Table S6. The risk scores and risk of HCC in TCGA database
id	futime	fustat	PON1	CYP2C9	ACACA	ACADS	ME1	ACAT1	ELOVL1	SMS	UGDH	ADSL	HSP90AA1	S100A10	riskScore	Risk
TCGA-CC-A3M9	0.821918	1	1.29419	1.23995	3.27528	3.54313	4.8312	5.66457	6.25158	7.99464	5.87135	6.40592	9.53613	8.80472	4.41697	high
TCGA-UB-A7MA	2.32329	0	5.93002	6.03191	4.03459	4.93892	3.38917	6.32216	5.45648	5.52356	6.07014	5.94212	8.05437	8.98992	3.19545	high
TCGA-UB-A7MF	0.586301	1	4.62465	2.77914	3.80924	6.87564	3.57424	6.64063	5.30594	5.40984	6.06644	4.68137	7.71951	9.11069	3.19452	high
TCGA-BC-A112	0.419178	1	5.19188	1.99488	4.39557	3.8049	6.23583	5.6415	5.66972	5.38925	8.28698	6.1819	8.62228	8.56915	3.57337	high
TCGA-BC-A10U	2.29315	1	7.42112	7.58726	3.91791	3.55848	4.01766	6.1868	5.43621	5.3704	6.41954	4.90711	8.46197	8.22433	3.02928	high
TCGA-FV-A3I1	0.676712	1	4.19148	5.51168	4.15288	5.51189	5.29899	7.23027	5.28423	5.39599	8.50451	5.27114	9.46651	7.6606	3.40314	high
TCGA-CC-A123	0.6	0	5.008	7.0307	3.7949	3.72052	2.33541	5.64633	4.92568	5.43788	6.19206	5.44484	8.89204	7.77124	3.07659	high
TCGA-WQ-A9G7	0.0821918	0	4.31477	4.72126	4.70091	4.83038	4.11565	5.89587	5.47493	5.6057	5.93078	5.20845	8.09612	6.67012	3.31731	high
TCGA-ED-A66X	1.11233	0	5.6766	1.76263	3.89533	5.06658	3.52168	6.42891	5.19611	5.98923	6.60836	5.55976	9.31718	7.64059	3.43319	high
TCGA-DD-A1EK	1.52877	1	6.13416	5.05528	3.93028	5.36571	4.08507	7.3851	4.85077	5.27581	6.88299	4.66973	7.76442	8.08988	2.99288	high
TCGA-DD-AADM	0.0328767	1	7.69516	6.75337	3.08209	4.82353	5.45811	7.79124	4.91805	5.17525	7.95874	4.64864	8.25308	8.88225	2.93613	high
TCGA-MR-A8JO	0.90411	0	4.63581	4.06846	3.04515	4.74219	3.04605	6.74157	4.70141	5.34641	6.12545	4.13776	8.60366	7.11322	2.97313	high
TCGA-QA-A7B7	0.257534	0	7.21411	6.12965	4.45951	6.0914	5.24829	7.56285	5.17801	5.3179	8.08589	4.66195	7.87692	4.79849	2.95909	high
TCGA-CC-A8HT	0.383562	1	5.19302	3.85095	4.07185	3.4792	5.6637	5.96167	5.10314	6.12919	8.09538	5.70536	7.79942	8.04404	3.49685	high
TCGA-FV-A4ZP	6.81096	1	5.88277	4.48264	3.22707	4.97847	4.60788	4.71303	4.93874	5.9054	7.28519	4.8783	8.59827	10.2366	3.35868	high
TCGA-CC-5258	0.353425	1	5.13816	6.51222	4.4832	3.24599	3.96998	6.4245	4.43821	5.94209	8.95372	6.14265	9.13671	7.99997	3.38798	high
TCGA-G3-A25X	4.87397	0	6.743	2.35522	3.37203	5.39808	3.14596	7.359	5.19015	5.73817	5.20147	5.58385	8.29551	10.4766	3.23736	high
TCGA-DD-AAD1	1.54521	0	7.20877	3.83628	4.21783	4.67637	4.41965	7.74148	5.25392	4.90939	6.32711	4.78732	9.01374	7.49736	3.02885	high
TCGA-5C-A9VH	0.882192	0	7.46551	7.5068	3.45633	5.38012	3.92667	6.96668	5.00337	5.33659	7.48827	4.8354	9.65095	9.16675	3.05833	high
TCGA-DD-A4NQ	1.02192	1	7.20568	4.27274	4.73959	4.76157	5.76643	7.25059	5.47439	5.93821	8.03631	5.54558	8.70472	8.36645	3.4861	high
TCGA-G3-A5SM	1.42466	0	6.62903	4.88667	2.95337	5.70476	5.23389	8.03609	4.78691	5.55742	6.90553	4.59014	8.68654	7.51795	3.07092	high
TCGA-CC-5262	0.282192	1	6.38153	6.48279	3.82481	4.53671	5.58735	7.28563	6.038	5.77393	7.27493	5.46865	8.50131	7.85749	3.35745	high
TCGA-2Y-A9GY	2.07397	1	3.35185	3.72316	3.87436	4.45573	6.08012	5.65428	5.45356	6.90221	8.991	6.43961	8.67447	9.19744	3.98899	high
TCGA-DD-AAVV	6.72603	0	7.40777	6.66535	3.35376	4.70853	4.88203	7.35261	5.70558	5.11632	7.67502	5.11574	8.55527	7.60702	2.99915	high
TCGA-DD-A39Y	0.468493	1	6.55217	3.6631	4.34186	4.42939	6.06782	6.80252	6.47722	5.5789	7.79614	6.15627	9.62892	9.05223	3.64923	high
TCGA-DD-AAD6	1.8411	0	6.77909	7.93699	4.5659	3.62415	4.88525	4.32104	4.76272	5.12911	7.92448	4.8976	7.81378	7.50961	2.99353	high
TCGA-HP-A5MZ	0.249315	1	2.39458	6.79963	3.38796	5.50793	5.35505	7.88244	5.20913	5.76833	7.66149	4.61572	9.19825	8.43728	3.45734	high
TCGA-DD-AAVU	6.03288	0	6.13812	2.75366	3.26832	4.36632	2.93767	7.77211	4.94567	5.61978	6.42199	5.99523	8.23937	8.62604	3.13422	high
TCGA-DD-A4NO	6.15068	0	7.57639	8.67635	3.79495	3.90694	5.56037	7.52408	4.76104	5.59439	7.80258	4.28484	8.47106	7.89461	3.02471	high
TCGA-BC-A10W	0.249315	1	7.01704	3.16544	4.10269	5.01485	6.25398	6.50922	6.18971	5.40118	9.2714	5.66982	10.2149	10.6599	3.64815	high
TCGA-DD-AADB	3.40274	0	3.89623	5.57022	4.08009	4.86702	4.17568	6.77483	4.87099	6.02464	8.18506	6.04367	8.66285	5.81669	3.38089	high
TCGA-DD-A1EF	1.07945	1	2.91293	5.73156	3.7154	4.68589	1.95839	4.96359	4.92877	5.35426	7.0335	5.60799	8.72798	6.72565	3.13107	high
TCGA-DD-AADL	1.74247	0	8.10346	4.81007	4.05275	4.9557	3.73232	8.21603	5.38249	5.47446	6.8885	5.51299	7.41532	8.18076	2.98893	high
TCGA-ED-A7PX	0.0164384	0	2.17443	4.56274	5.18159	4.88034	4.15773	6.5077	6.44615	6.40555	7.88582	4.68518	9.18304	7.30549	3.84287	high
TCGA-DD-AADK	2.87397	0	6.28492	6.16351	3.59456	4.77086	3.87218	7.64158	4.77611	5.27885	5.40294	4.88619	8.43944	8.53755	2.98744	high
TCGA-GJ-A9DB	0.183562	1	7.07137	3.92769	3.9126	5.13362	4.2011	7.92873	5.21408	5.13625	6.99444	5.16216	8.35349	8.15416	3.03907	high
TCGA-UB-A7MD	0.142466	1	6.76335	6.84569	3.31618	4.65874	5.93098	7.15947	5.82577	5.72223	8.13379	4.87394	8.96991	9.06405	3.33424	high
TCGA-FV-A3R2	0.531507	1	7.62736	6.10106	4.31243	4.66435	3.18161	7.17962	5.55525	5.24531	6.64901	5.46443	8.77047	6.95242	3.00409	high
TCGA-BW-A5NQ	0.003	0	2.25992	6.41537	4.42263	4.68633	4.63135	7.31918	6.12733	6.43327	7.61596	5.3864	9.11915	7.343	3.76339	high
TCGA-DD-A4NG	2.19726	1	2.61747	5.97013	3.99413	4.53358	4.54209	7.94199	4.86512	5.34609	7.4607	4.57442	8.56115	7.93419	3.25217	high
TCGA-2Y-A9H0	10.0685	0	6.59117	6.47062	3.61958	5.38605	3.42428	6.98366	4.92311	6.18258	8.22349	4.66608	8.15718	8.04932	3.15163	high
TCGA-5R-AA1C	1.42466	0	6.55414	7.11874	3.40682	4.91671	6.27292	7.46821	4.89138	5.14129	7.85769	5.40919	8.71532	8.52333	3.11899	high
TCGA-ED-A8O6	0.153425	1	2.17314	5.9362	4.42018	5.60015	2.42585	2.57821	5.85412	5.6755	7.08741	5.55267	8.09761	8.18278	3.44555	high
TCGA-DD-AADD	3.3726	0	3.32074	7.39989	4.94909	5.08441	2.06383	6.9231	6.13468	5.68039	6.71089	5.75891	7.93725	8.77485	3.35529	high
TCGA-CC-A9FV	0.003	0	1.10265	1.24546	3.02938	5.47077	4.2456	7.22814	5.93231	5.76729	4.54761	4.91503	9.03945	6.99784	3.5616	high
TCGA-WX-AA44	1.68493	0	6.60696	3.4622	3.70392	5.718	5.47829	6.66947	5.28899	5.91803	8.36637	4.78615	8.96813	8.61816	3.41298	high
TCGA-PD-A5DF	1.75068	1	7.33185	2.62386	3.91728	5.47123	5.01374	8.45342	5.06528	5.38493	5.6028	4.96676	9.09065	8.43874	3.20488	high
TCGA-YA-A8S7	1.12877	1	4.56338	4.27466	3.43839	4.57104	5.46658	6.20596	6.01748	6.78434	8.27045	5.71142	9.22271	10.452	3.90209	high
TCGA-DD-AACH	0.534247	1	6.00741	2.60296	3.99515	5.19562	4.81785	6.54664	5.69162	5.61765	9.48888	5.40518	8.62049	9.31037	3.43654	high
TCGA-CC-A8HV	0.764384	1	5.83613	7.21708	4.23202	4.38484	4.53762	5.76919	5.35167	4.47381	7.24335	4.29329	8.53885	8.86137	2.94461	high
TCGA-BW-A5NP	0.003	0	5.42304	5.19495	3.81462	4.52096	1.51281	6.82895	4.55607	5.2774	7.45861	5.83193	9.24344	8.57396	3.03831	high
TCGA-DD-AAED	2.09041	0	7.85306	7.58955	3.81646	3.75007	2.51446	4.88901	5.03541	6.92166	8.75694	5.11577	7.66298	9.04298	3.27259	high
TCGA-DD-A4NN	2.46301	1	5.6516	2.42755	3.25736	4.77421	1.75205	6.25928	5.01729	5.06767	5.62934	5.66857	10.0399	9.00522	3.11796	high
TCGA-UB-A7MC	1.36986	0	6.92433	9.2439	3.95734	4.75051	4.50636	6.84732	4.28248	5.0975	8.79339	4.37953	9.56907	7.91438	2.93121	high
TCGA-FV-A4ZQ	0.0328767	0	6.69919	8.03323	4.22525	4.80637	3.45836	6.33685	5.17366	5.61659	6.60138	5.70981	8.93718	7.60827	3.14218	high
TCGA-DD-AAD5	3.68493	0	4.41227	2.69796	4.5483	5.31326	5.20413	5.93501	5.62668	5.77766	7.07436	5.69852	8.28055	9.68565	3.62167	high
TCGA-XR-A8TD	2.82192	0	6.08737	4.18148	3.59152	4.97222	5.86754	7.69395	5.3787	5.54098	6.56314	4.41018	8.21754	7.88641	3.22219	high
TCGA-KR-A7K7	2.60548	0	5.05694	5.90907	3.28521	4.80753	3.90837	5.8763	5.21374	5.63704	5.37356	5.18178	8.54815	7.71519	3.18199	high
TCGA-G3-A25Y	1.23836	1	4.87209	6.31748	3.28461	4.73694	3.86565	7.54808	5.56303	5.85837	6.52496	5.95171	9.00718	6.80183	3.28944	high
TCGA-K7-AAU7	0.983562	0	4.55654	6.73963	3.75951	4.34465	4.75718	5.59621	5.54528	5.39534	9.26264	4.45176	9.66636	8.26679	3.33655	high
TCGA-BC-A10Z	0.0931507	1	7.25874	8.53612	5.58788	5.88998	5.50423	7.51744	4.85124	4.83736	7.65909	4.85257	8.4199	6.53148	2.97371	high
TCGA-DD-A1EG	3.7589	1	6.12757	5.30143	3.60422	4.77242	5.70263	7.94024	5.40782	5.928	8.08677	5.39496	8.75584	8.37056	3.40024	high
TCGA-CC-A7IL	0.761644	1	5.37574	8.90195	4.99325	5.1264	4.2036	7.16952	4.73097	4.7535	6.13269	6.00348	8.39016	8.47973	3.02667	high
TCGA-ED-A7XP	1.09589	0	6.65579	8.12142	3.4255	3.90223	5.24593	6.70341	5.30738	5.59188	8.56962	4.15104	8.99199	8.40451	3.14899	high
TCGA-2Y-A9HA	0.0986301	1	6.13535	7.59543	4.0262	5.93243	3.84734	7.52057	5.36898	5.45702	7.8985	6.06154	8.89305	8.70126	3.205	high
TCGA-DD-AACW	3.90137	0	5.67816	3.57459	3.9389	5.26332	2.0849	7.11455	4.02583	5.79762	6.89137	5.73951	8.85433	8.22839	3.14088	high
TCGA-MI-A75I	1.72603	0	8.06938	5.91249	3.98261	4.85208	4.6859	7.1723	5.44369	5.25801	7.35893	4.7698	8.32958	5.75503	2.93432	high
TCGA-FV-A3I0	2.32329	0	1.51693	2.97005	2.92455	5.07613	2.87153	5.37953	6.13713	7.06215	5.15492	5.30303	7.50298	7.75391	3.7103	high
TCGA-CC-A8HU	0.942466	1	4.94238	7.35381	3.31549	5.98179	1.78144	6.00088	5.71446	7.07275	6.28702	5.32044	8.62338	9.89778	3.5315	high
TCGA-CC-A1HT	0.276712	1	3.82631	2.32538	4.47666	3.41705	4.3574	5.57203	5.73455	6.58613	8.69031	5.57404	8.79977	10.8411	3.90731	high
TCGA-CC-A5UC	0.950685	1	5.1451	6.69248	5.05335	4.17519	4.20982	6.33932	4.80021	6.26515	7.43523	6.17758	8.88281	7.63806	3.52321	high
TCGA-BD-A3EP	1.12055	0	7.01368	4.83599	3.42164	4.86415	5.50725	8.66098	5.77397	5.23605	8.0368	4.59329	9.35275	6.93833	3.13763	high
TCGA-DD-A39V	1.76164	1	6.39159	6.58622	3.05646	3.68891	4.63904	6.68006	5.18974	5.25879	6.96664	5.36557	9.00815	9.74693	3.13973	high
TCGA-DD-A3A1	0.638356	1	6.66678	5.76389	3.80052	5.2818	6.55105	7.70044	5.40888	5.20007	8.43622	4.83246	8.3465	8.21695	3.18098	high
TCGA-DD-A4NR	0.0246575	1	6.07996	5.16801	4.1915	6.2756	5.18328	6.71999	5.2121	5.4744	7.04233	4.66862	8.93271	8.03547	3.26694	high
TCGA-CC-5259	0.684932	0	6.2446	5.82327	2.77281	4.42499	3.29257	6.62363	4.35229	6.04039	7.29964	3.98299	8.81272	8.38899	3.0543	high
TCGA-DD-AADC	1.16438	1	7.41604	3.15873	3.65944	3.52684	6.35516	7.13902	6.70318	5.69787	6.75234	5.63139	9.45043	9.33392	3.59008	high
TCGA-CC-A7IK	0.717808	1	3.3972	7.53022	4.64743	3.96001	6.30556	6.44594	5.09823	4.91042	8.09808	4.80577	9.34041	8.4085	3.36311	high
TCGA-G3-A5SJ	1.91233	0	6.91469	7.10765	3.32568	4.6743	4.03616	4.98759	6.09887	5.36064	7.10572	5.28852	10.0557	9.22091	3.27682	high
TCGA-RC-A7SB	1.61096	0	7.11145	2.82016	3.17967	3.75539	2.71143	6.51882	5.10715	5.74375	5.389	5.40503	8.72826	7.8095	3.1028	high
TCGA-DD-AADN	2.46027	0	4.31921	2.38722	3.59151	4.04991	5.34347	5.90184	4.47724	5.521	7.33855	5.76378	8.087	8.75201	3.35503	high
TCGA-CC-A5UE	0.745205	1	7.11612	3.31739	4.05132	4.78352	5.27031	6.90102	6.34077	6.02955	8.13587	6.81937	8.84171	9.93775	3.66099	high
TCGA-DD-AACZ	0.468493	1	3.76525	5.88742	5.09734	4.07646	6.15839	5.80422	5.44057	6.38935	7.91613	6.05774	8.67713	8.79283	3.85099	high
TCGA-2Y-A9H8	1.73425	1	4.76661	4.07675	3.19782	6.07335	1.87582	6.73402	5.1091	5.20857	6.62014	4.95358	9.49831	5.73126	2.97112	high
TCGA-DD-A4ND	7.52329	0	3.85176	7.12957	4.08918	5.38393	2.72564	6.68271	4.81779	4.73781	5.8112	5.33707	8.98092	7.77353	2.97712	high
TCGA-G3-A25S	1.13973	1	6.25684	7.17526	3.27957	4.62039	4.50318	6.35464	5.47708	5.65362	7.55581	5.27796	9.30961	8.39076	3.24692	high
TCGA-BC-A217	3.8274	1	5.83227	7.3365	3.08193	4.93116	2.91135	7.21797	5.19105	5.82286	6.20121	5.05629	8.01272	10.7785	3.12222	high
TCGA-2Y-A9GW	3.48219	1	6.99117	5.00407	3.23155	4.41521	5.15658	7.16907	4.95743	4.87939	7.93491	4.52579	9.33135	7.98454	2.98962	high
TCGA-G3-AAV6	0.178082	1	2.04146	4.24632	3.47052	5.33117	1.63572	5.30275	4.55928	5.62332	6.09894	6.03609	9.85498	8.97839	3.39241	high
TCGA-ED-A97K	0.0164384	0	5.39028	5.86202	3.99956	4.59732	3.35282	7.30366	5.40404	6.83559	7.08405	4.66332	8.42292	9.09089	3.51299	high
TCGA-DD-AAVW	6.34795	0	6.88471	8.09397	3.47378	5.08112	4.20454	6.62572	4.62301	5.16948	7.90245	4.67421	9.93633	8.62892	3.01948	high
TCGA-EP-A3RK	0.994521	0	5.82447	5.04249	3.68489	4.1392	4.1468	6.83224	5.57027	6.05129	6.9846	5.23634	8.46878	8.03279	3.34641	high
TCGA-CC-A3MB	0.863014	1	6.67075	6.77942	4.54602	4.65294	5.91992	7.71731	5.5614	5.9972	8.46121	6.07364	8.85278	8.09271	3.49693	high
TCGA-ZS-A9CD	3.79726	1	6.96295	5.73136	3.13764	5.23834	4.7067	8.08745	5.23695	5.01206	7.30716	4.76792	9.07124	7.75533	2.96489	high
TCGA-G3-A7M6	1.73151	0	4.48366	5.6165	4.18033	4.2925	3.59043	6.71327	5.3574	5.20225	6.2499	5.58046	9.55377	8.6153	3.2961	high
TCGA-DD-A1EJ	2.75342	1	5.12552	3.22828	4.90503	5.45749	3.60257	6.62371	5.95567	6.35046	6.86784	6.59132	9.1207	7.80243	3.71363	high
TCGA-DD-AADY	1.52055	0	6.3946	2.77381	3.8989	4.12271	3.57901	7.10546	4.57871	5.35734	6.07116	5.022	9.11827	5.26995	3.02196	high
TCGA-CC-5263	0.353425	1	6.01348	7.34271	4.00061	4.80152	5.08898	5.51804	5.2902	5.56867	7.55011	5.70076	9.95739	8.85795	3.41505	high
TCGA-5C-A9VG	0.89863	0	1.80946	5.23914	4.85422	5.8631	2.26915	7.2738	4.67456	5.2899	6.33374	5.82909	9.26478	5.38051	3.24197	high
TCGA-DD-A1EE	0.956164	1	6.96618	7.6911	4.44435	4.75524	4.73693	7.54575	5.0159	5.14832	9.13262	4.78587	9.20308	7.85421	3.07378	high
TCGA-GJ-A3OU	2.40822	0	6.4838	5.54985	4.04142	4.7199	6.09745	6.62892	5.34578	6.00388	7.57932	5.15672	8.92329	8.8294	3.48592	high
TCGA-BC-A10Q	3.10959	1	1.54083	7.08012	3.02551	6.09037	1.79754	6.56224	6.19036	5.97475	5.42066	4.42553	8.3322	10.0842	3.3734	high
TCGA-DD-A113	6.64384	0	6.12028	5.02683	3.95751	5.70818	4.49117	6.9757	4.92257	4.74186	8.35218	4.11096	8.4031	8.72909	2.94744	high
TCGA-CC-A3MC	0.994521	0	7.12048	7.49944	3.60357	5.28167	5.82695	6.26189	5.14477	5.33958	7.60377	5.76925	8.13096	7.80245	3.10418	high
TCGA-FV-A2QR	1.59178	1	8.42898	5.65099	3.87317	4.57205	5.4347	6.86892	5.7378	4.98842	6.71014	5.22993	9.11034	8.93136	3.11846	high
TCGA-G3-AAV7	0.989041	0	6.49709	4.90185	4.21218	4.15118	5.02652	7.23095	6.275	6.44233	8.29873	6.25575	8.77345	9.13212	3.6883	high
TCGA-CC-5261	0.265753	1	4.42039	5.13453	3.9558	4.42925	2.96207	7.07064	5.14822	5.68155	6.67165	5.43201	9.16114	7.80228	3.28607	high
TCGA-ZP-A9D2	2.09589	1	5.30041	4.68243	4.24952	3.82683	5.93733	6.49029	5.93796	5.834	6.39488	5.79309	8.2093	8.84744	3.5531	high
TCGA-G3-A25T	4.25479	0	4.55271	4.51134	2.89373	6.83312	2.43216	7.02783	6.80405	6.15813	4.97338	4.68115	8.44696	9.63116	3.40401	high
TCGA-DD-AAEA	1.57534	0	2.72643	4.89868	3.59502	4.26952	1.92223	6.31621	5.19451	5.33887	5.90264	4.98659	7.61969	8.61729	3.09011	high
TCGA-RG-A7D4	3.00822	0	5.13982	6.76124	4.52194	4.41745	3.68184	5.69097	4.73606	5.58355	6.45347	5.64555	9.01164	7.93367	3.26533	high
TCGA-EP-A3JL	0.830137	0	6.95524	6.20364	3.0772	4.68231	4.29372	7.29764	5.09531	6.03915	7.33214	5.04575	8.98371	7.84943	3.19833	high
TCGA-G3-AAV4	0.0739726	1	3.55949	3.06397	3.61187	5.80158	1.77574	7.53515	4.84233	5.77118	5.68397	5.03416	8.7962	8.26321	3.2286	high
TCGA-ED-A459	2.49315	0	7.25807	6.2533	3.9849	3.08166	4.5907	8.03322	5.59721	7.10528	6.91882	4.87072	8.41526	6.6523	3.48185	high
TCGA-RC-A6M3	0.003	0	6.1318	4.91388	3.88082	3.78941	3.57808	6.27189	5.70969	5.58992	5.83743	4.40899	10.117	7.26741	3.27587	high
TCGA-DD-AACU	4.29315	0	7.90027	8.48273	3.47646	5.4792	3.79666	8.17479	5.96144	5.47082	7.32121	5.60845	9.12204	9.03939	3.0985	high
TCGA-CC-A8HS	0.821918	1	3.40167	2.64421	4.19798	4.73549	1.78527	6.9352	4.59732	5.37566	6.6992	5.85957	8.59985	7.99899	3.19989	high
TCGA-DD-A1EL	1.13699	1	3.9148	4.07088	4.3646	3.78542	6.22251	7.46256	6.25603	6.69217	8.83958	6.49515	8.66506	8.79693	3.97728	high
TCGA-DD-AAD0	0.375342	0	1.60477	7.72759	3.53729	5.26204	2.94566	7.71253	4.46398	4.68379	6.99894	5.02162	9.05292	8.86202	3.02074	high
TCGA-DD-A114	3.14795	1	6.26966	5.67611	3.68295	4.51183	4.49382	6.35456	6.09163	5.64856	8.11239	5.15908	9.22807	9.09611	3.37836	high
TCGA-5C-AAPD	0.0547945	0	5.35249	6.40746	3.48756	5.46057	4.22156	6.53573	5.62937	6.94382	5.76897	5.58705	8.55019	9.22706	3.63054	high
TCGA-T1-A6J8	0.0630137	0	7.17282	6.15489	3.2864	5.92037	5.06874	7.26443	5.13703	5.55721	8.32857	4.7633	8.48484	6.90962	3.04786	high
TCGA-XR-A8TC	3.66849	0	1.26029	8.72829	3.5976	5.80322	2.35114	6.4036	4.07814	4.92269	6.09765	5.04319	8.72921	7.6126	2.95781	high
TCGA-DD-AACK	0.0246575	0	6.78502	7.77787	4.29068	5.89018	5.81298	7.92095	5.08716	4.79783	8.5227	5.02778	8.64697	7.66946	3.00404	high
TCGA-MI-A75C	0.79726	0	6.22385	6.48537	3.72685	6.79529	4.57861	6.99149	4.76647	4.99262	7.58508	5.00625	8.18237	8.94988	2.97959	high
TCGA-DD-AACP	1.13699	0	5.30094	6.47741	4.32631	4.59938	3.08353	5.89555	5.11204	5.32964	6.54499	5.83557	9.16828	9.20161	3.24284	high
TCGA-BC-4072	4.08219	1	3.20913	8.24807	4.11213	4.44119	3.3994	6.57467	5.55268	5.15175	5.93701	4.86172	9.16664	8.30356	3.21022	high
TCGA-BC-4073	2.32603	0	6.73615	3.38659	4.74606	4.52254	5.42258	6.27948	5.31521	4.94038	7.80616	5.25849	9.77382	7.76723	3.30226	high
TCGA-RC-A6M6	0.0246575	0	7.35691	3.59975	3.8481	4.50033	5.48076	6.40226	5.73969	6.39706	7.61826	6.09957	9.04715	8.45938	3.61433	high
TCGA-BC-A69H	1.21644	0	8.43815	6.20084	4.60428	5.42535	4.35426	6.06112	5.19749	5.1769	7.01058	7.09451	9.14358	8.89439	3.20827	high
TCGA-DD-AAC8	0.0438356	1	2.12374	5.20016	3.51104	3.42829	4.25709	6.195	5.32988	5.4218	7.52567	4.81503	8.94075	8.29483	3.3786	high
TCGA-ED-A5KG	2.33973	0	4.61828	1.50435	3.629	4.23438	3.31534	6.24697	5.32292	5.74463	5.83464	5.61031	9.28918	7.56978	3.40434	high
TCGA-DD-AACO	5.13973	0	6.63542	5.75978	3.04782	5.87786	4.2392	6.74984	4.98181	5.64792	7.39535	4.59909	8.66389	9.54399	3.12882	high
TCGA-G3-A25Z	1.79452	0	6.77999	4.32834	3.80756	5.33916	4.57403	7.47092	5.00103	5.0055	6.29597	5.26252	9.09408	7.91005	3.06792	high
TCGA-DD-A39X	4.6411	1	6.17304	7.25314	3.30364	5.83	4.1892	7.27822	5.19929	5.55116	7.55654	5.16231	8.54348	9.83844	3.15252	high
TCGA-EP-A2KA	1.71781	1	6.2858	3.79162	3.52298	4.70729	4.36595	6.91313	5.03479	5.14801	7.82428	4.74355	8.05008	7.82986	3.00831	high
TCGA-DD-A1EC	1.64932	0	7.46574	3.599	4.25699	5.06467	2.80428	7.00799	5.70652	5.10006	5.6356	4.75498	9.33862	6.05266	2.99304	high
TCGA-GJ-A6C0	0.0849315	1	1.39511	2.72011	3.0442	4.79982	4.69696	6.23087	4.88272	5.92975	7.52225	5.16532	8.52745	8.89113	3.55808	high
TCGA-2Y-A9GS	1.98356	1	7.60864	3.50741	3.97683	5.06396	6.57784	7.83797	5.30283	6.00413	8.52728	5.84204	9.37367	8.22522	3.53048	high
TCGA-BC-A8YO	1.53973	0	7.3193	4.24263	4.17914	6.6786	5.83112	7.00285	4.63253	5.25397	8.32403	5.24298	9.26891	8.81968	3.24183	high
TCGA-CC-A9FW	0.679452	0	4.71542	4.1611	4.81858	4.35816	4.16976	6.92956	5.20331	5.8014	6.14617	5.93878	9.525	8.51743	3.55453	high
TCGA-CC-A5UD	0.832877	1	2.27182	2.23531	4.42253	5.10188	5.55866	5.70119	5.95819	5.18878	8.65051	5.48251	9.55844	10.4638	3.75878	high
TCGA-DD-A119	0.610959	1	6.18024	7.76621	2.95298	5.26303	3.56981	7.30246	4.46469	5.68868	7.41585	5.14208	8.44599	8.40827	2.98488	high
TCGA-DD-AACB	6.36712	0	1.47994	6.89169	3.28708	5.37529	2.55981	6.48526	5.67079	5.40246	8.68326	5.95824	8.52658	8.35829	3.30023	high
TCGA-DD-A1EH	4.09589	0	1.70905	2.96246	4.22598	4.96595	2.37582	7.74347	5.14858	5.2891	7.34796	5.46899	9.11648	8.58457	3.37644	high
TCGA-DD-AACX	0.465753	0	4.87782	4.99051	4.29061	5.17319	3.54259	6.96647	5.18609	5.39793	7.82672	5.09868	7.31555	8.38076	3.11923	high
TCGA-DD-AACC	4.61644	1	7.31668	6.03002	2.99986	5.11397	3.63306	7.44669	5.05603	5.45985	5.72591	5.05559	9.01713	7.96091	2.98383	high
TCGA-CC-5264	0.279452	1	7.85304	6.78936	4.35838	4.87185	1.66135	6.38837	5.72933	5.56203	7.13479	4.74665	8.8406	9.94348	3.07336	high
TCGA-DD-AACI	4.43288	0	7.61124	5.71632	2.57261	4.78179	3.19752	7.01091	5.52496	5.45034	7.15413	4.65543	8.56193	9.28617	2.95383	high
TCGA-DD-A4NH	2.51233	0	5.42319	2.34747	3.75828	4.44869	3.67949	5.72262	4.97407	5.76915	6.18228	5.21321	8.4308	8.36349	3.30151	high
TCGA-ED-A82E	1.11781	0	1.19024	2.64214	2.86704	4.55323	3.0204	6.82716	5.8653	5.67443	5.01892	5.10399	8.13888	7.25654	3.36053	high
TCGA-FV-A2QQ	1.99726	0	6.44639	6.60086	3.24211	5.66525	5.04317	7.67148	4.46336	5.44582	8.1045	5.46279	8.95377	8.76039	3.11651	high
TCGA-DD-AACG	1.28493	1	6.00203	6.68473	3.99705	4.26972	3.45078	6.59322	5.49541	5.6638	7.78108	5.83352	8.1963	8.77082	3.2173	high
TCGA-EP-A2KC	0.0520548	1	7.14523	7.66267	4.3305	4.05575	4.43754	7.02278	4.90211	5.20794	7.35168	4.82642	8.72032	7.84219	3.00742	high
TCGA-DD-AACL	0.293151	1	3.62581	5.44979	4.15951	4.37475	4.05013	6.15633	5.27687	6.52112	6.35988	6.61558	8.96431	8.01777	3.69433	high
TCGA-DD-A116	4.44384	1	8.34276	7.7433	3.94894	5.05904	3.75882	6.43326	4.56483	5.5149	4.37994	5.31075	9.0243	8.09605	2.97839	high
TCGA-CC-A7IG	0.819178	1	5.83318	5.08037	3.88351	5.27095	3.85406	6.77482	5.26908	5.15449	7.59352	5.8893	9.09087	8.76886	3.19887	high
TCGA-DD-AAE9	1.97808	0	7.481	7.68888	3.05001	5.16299	3.77584	6.53652	5.4677	5.78917	6.91845	4.71195	8.44937	8.11231	3.0304	high
TCGA-G3-AAV5	0.969863	0	6.6159	7.53618	4.48527	5.18583	5.81138	6.44382	5.25303	5.41897	7.5179	5.8005	9.59672	8.66217	3.37771	high
TCGA-CC-5260	0.238356	1	1.26886	2.81605	4.09246	4.44837	2.92325	4.95285	6.83032	6.01165	5.89779	4.67356	8.85981	8.47171	3.72614	high
TCGA-CC-A7IJ	1.04658	0	1.13955	1.47422	3.75049	3.8566	5.78122	4.93721	5.72964	7.53331	5.44778	6.68495	9.76634	9.01568	4.40271	high
TCGA-DD-AADI	2.9726	0	6.1917	5.49479	2.9195	5.69643	2.28322	7.32529	5.2229	5.35843	5.06299	5.65052	9.23293	8.02484	3.00054	high
TCGA-DD-A4NA	2.76164	0	2.58008	5.0178	3.64521	4.7547	2.42801	7.03399	6.27772	5.25435	5.43427	4.99015	8.88056	7.00156	3.23363	high
TCGA-RC-A7SH	1.28219	0	6.07937	2.41363	3.66893	5.94074	2.18094	5.59222	5.09192	5.61527	5.82794	4.78621	7.62717	9.26688	3.08347	high
TCGA-WJ-A86L	0.945205	0	2.1025	6.04529	4.5106	5.91673	4.50052	6.1973	5.75281	4.74772	6.80348	4.51168	8.00994	8.01074	3.21595	high
TCGA-DD-AA3A	1.12329	1	2.82705	6.75114	2.89527	3.99885	3.38697	5.81359	5.33178	6.12033	7.58279	5.38362	8.64399	7.62675	3.37027	high
TCGA-CC-A7IE	0.594521	1	2.45172	3.15547	4.13723	3.77695	3.39929	5.62819	4.58502	6.262	6.23911	5.57881	8.4275	6.24165	3.48483	high
TCGA-DD-AAVS	4.99452	0	7.35495	7.58541	3.33063	5.06497	3.5665	6.93828	4.93664	5.52588	8.1248	5.17295	9.747	8.83673	3.08819	high
TCGA-BC-A3KG	1.86301	0	6.33502	5.70765	4.29404	5.47102	3.25402	7.95063	5.32847	5.84099	7.43304	4.76124	7.70112	4.32759	2.99019	high
TCGA-CC-A7II	1.09315	0	1.73195	1.30844	4.34189	3.25744	3.79162	6.43913	5.26723	6.82341	8.02597	7.39141	9.30612	7.23564	3.99998	high
TCGA-2Y-A9GX	6.69041	0	7.24493	7.42894	3.48641	4.71274	6.10396	8.42706	5.01445	5.5135	8.12403	4.63875	8.14917	7.72577	3.05287	high
TCGA-CC-A3MA	0.830137	1	4.11693	4.87457	3.98713	3.88958	4.18177	6.25145	6.55562	6.07819	5.67097	5.26465	8.17765	7.38921	3.51414	high
TCGA-DD-AADW	1.60822	0	4.65873	6.79321	4.21285	5.16902	3.10639	7.2455	5.34152	5.73443	5.90243	5.30153	8.42624	6.64112	3.18356	high
TCGA-DD-A1EI	0.50137	0	8.07083	6.88175	4.52564	5.20605	5.36783	7.99465	5.47737	5.52628	9.80311	5.61884	8.97109	7.47113	3.22361	high
TCGA-ZP-A9CZ	1.93425	0	7.423	8.24924	4.31702	5.67052	3.97994	6.49987	5.191	5.30366	7.78362	4.89157	8.38357	8.40815	3.00522	high
TCGA-KR-A7K0	0.178082	1	6.97469	7.66504	3.32952	5.1238	4.63131	7.75007	4.54184	5.59474	6.97678	4.66	8.33141	7.91458	2.96618	high
TCGA-UB-A7MB	1.64658	0	6.88052	6.17389	4.97804	6.72734	3.7537	7.30299	5.23808	4.74192	6.69075	5.21512	8.1271	8.24781	2.95307	high
TCGA-XR-A8TE	2.53425	0	2.87007	6.43065	3.87683	4.44281	1.64987	6.1735	4.99499	4.84355	5.98874	4.84943	9.08357	6.75838	2.95654	high
TCGA-DD-AACF	1	1	1.99375	8.08276	2.72878	4.25498	3.26198	7.60445	4.93865	6.12754	4.96316	5.26255	8.47789	8.77895	3.31703	high
TCGA-ZP-A9D1	0.0575342	0	6.42135	5.89587	3.22252	4.22791	4.43954	7.43307	4.81601	5.43342	7.0947	4.7988	8.87146	9.15676	3.09621	high
TCGA-DD-A3A7	1.14795	1	6.38622	2.42168	3.85511	5.63014	4.77686	5.0392	4.46098	4.67797	8.06477	4.78463	8.10143	8.18532	2.96272	high
TCGA-LG-A6GG	1.06027	0	2.97003	7.35605	3.26764	4.23907	3.09946	7.20195	5.39207	5.09912	7.42433	4.76429	8.25184	8.17256	3.0402	high
TCGA-G3-A7M9	0.153425	1	2.19812	3.28069	4.2187	4.74633	3.85626	5.86576	5.61072	6.66188	6.72087	6.91363	8.64066	9.37725	3.91668	high
TCGA-DD-AACJ	5.7589	0	5.75018	5.2356	4.58151	4.74751	5.3497	6.43618	5.65187	4.45861	6.98064	5.73086	8.96226	8.11241	3.16352	high
TCGA-DD-AAE0	1.52055	0	3.49715	2.78397	3.89881	3.99452	3.37666	5.78139	5.99178	6.12307	4.77173	6.57488	7.96587	9.47484	3.62681	high
TCGA-DD-AAE4	1.66575	0	8.11603	7.83782	2.45047	5.87683	2.11862	8.58142	4.08494	4.96406	5.72897	4.60589	7.87709	7.82393	2.41663	low
TCGA-DD-A4NI	2.23562	0	8.23167	9.14939	2.85616	4.84854	4.13687	7.56319	3.96389	4.35936	6.55516	4.02141	7.92628	7.54401	2.35499	low
TCGA-G3-AAV3	1.12877	0	7.55786	8.25866	3.27295	4.61844	2.05667	7.62205	4.76874	5.26121	7.23876	3.97437	8.41311	6.9718	2.63355	low
TCGA-BC-A5W4	1.49863	1	8.35402	6.58485	3.19535	4.96306	1.81847	7.26853	5.55851	5.43865	6.73427	4.49955	9.06817	8.23915	2.85179	low
TCGA-DD-A4NJ	2.54247	0	6.25797	6.46886	4.58686	4.73876	2.19718	7.14896	5.1192	4.92324	6.53908	5.07665	8.72402	8.10818	2.92479	low
TCGA-EP-A2KB	1.63288	1	5.58275	9.08082	3.57897	4.65312	1.89636	6.26706	4.27724	5.21934	6.27194	5.175	8.02125	8.85776	2.79074	low
TCGA-G3-A3CK	1.60274	0	6.79073	6.25073	3.3591	4.76363	2.14954	7.48664	4.36573	4.73946	7.73923	4.5925	8.56925	7.73052	2.63635	low
TCGA-DD-AACA	6.30411	0	6.37454	7.83784	4.97036	4.32188	1.43388	7.41021	5.33341	5.02808	6.42007	4.99031	7.89148	8.0718	2.84024	low
TCGA-FV-A23B	5.07397	1	5.34283	4.97237	4.17648	4.10896	2.09922	7.08346	4.40142	4.77357	6.08168	5.02919	8.96491	7.4075	2.85679	low
TCGA-DD-AADR	5.55616	0	7.65654	7.07487	3.61712	4.2201	1.90064	7.22075	4.36524	5.64459	7.60135	5.25131	8.45553	9.05446	2.88756	low
TCGA-MI-A75E	1.38904	0	7.47739	6.38653	3.82402	4.82066	4.67738	7.74093	5.06384	5.10559	7.10004	4.48581	7.99241	7.48406	2.88014	low
TCGA-DD-A11D	4.27397	1	7.60583	6.84187	3.40883	4.49012	4.80433	7.37091	5.18034	4.741	6.1565	4.74951	8.18682	8.87716	2.83521	low
TCGA-ES-A2HT	1.2	1	7.58523	7.95127	2.97063	5.53432	3.83992	7.81003	4.69226	5.20945	5.6211	4.21205	8.65551	8.58375	2.78655	low
TCGA-DD-AAW0	5.52055	0	7.45987	7.71105	3.40134	4.95092	5.28878	8.04105	4.72378	5.04333	6.54398	4.90052	8.80513	8.56121	2.9289	low
TCGA-G3-A3CI	0.493151	0	7.17117	5.47132	3.01299	7.09641	2.74657	7.75076	4.51466	4.39008	5.05203	4.16208	7.33734	5.38015	2.34695	low
TCGA-DD-A1EB	5.52603	0	7.47685	2.38724	4.30891	3.99803	4.95193	7.97366	5.13644	4.39102	5.52826	3.78695	8.34183	4.02164	2.70853	low
TCGA-ED-A4XI	2.24384	0	7.61959	8.7486	3.26446	6.43789	3.73968	7.80269	4.6523	4.54533	7.60958	4.39626	8.29251	6.3371	2.51559	low
TCGA-LG-A9QC	1.16438	0	7.10383	8.72396	3.9461	5.89971	4.19276	8.25585	4.44986	4.73423	6.73637	4.67091	9.01285	7.61679	2.76603	low
TCGA-DD-A11C	1.8137	0	7.91853	7.09704	3.1147	3.63035	2.09793	8.09706	4.31068	4.55773	6.18585	4.77714	8.1084	6.00298	2.38144	low
TCGA-DD-AAVZ	5.20548	0	7.03702	9.29878	3.58361	5.5529	2.26992	7.43635	4.50644	5.31178	7.42465	5.16143	9.42987	7.74789	2.83895	low
TCGA-BC-A216	3.70137	0	6.56879	7.64296	3.84051	5.51868	2.59556	6.62141	5.26799	5.31471	6.51606	4.61534	8.25237	6.56131	2.85032	low
TCGA-KR-A7K8	2.48219	0	7.70547	7.76383	2.65211	5.38367	3.64289	7.2108	5.4645	4.67918	5.88763	5.43764	8.07826	7.29851	2.65491	low
TCGA-BW-A5NO	0.0547945	0	7.31292	7.03631	4.19187	4.59408	2.47945	6.97315	5.08608	4.85388	5.95331	5.41736	7.87036	8.34578	2.78038	low
TCGA-DD-A39W	2.26575	1	6.27519	5.56873	4.52952	5.13172	1.58723	6.29924	4.70945	4.59632	5.95998	4.98091	9.14543	6.90945	2.77865	low
TCGA-DD-A1EA	6.61644	0	5.25912	7.8527	4.126	4.22223	2.08933	6.92492	4.19583	5.23742	6.6237	4.82681	8.33108	7.22564	2.82927	low
TCGA-ES-A2HS	1.88493	1	8.06743	7.94182	3.07935	4.99339	2.708	7.90191	3.76462	4.37367	5.4363	4.43945	8.14434	7.56327	2.3376	low
TCGA-G3-A3CJ	1.6274	0	7.84652	8.62268	3.4035	5.35581	2.68714	8.23594	4.19339	4.52223	6.2563	4.3739	8.24941	8.37772	2.46604	low
TCGA-2Y-A9GZ	2.32329	1	7.67308	9.62236	2.95551	4.79431	1.51165	7.54027	4.05504	4.6504	6.3697	5.10852	8.19778	7.44288	2.37408	low
TCGA-4R-AA8I	0.717808	1	7.05836	7.58887	2.74705	5.86811	3.71342	7.96001	4.69963	4.55675	7.39189	5.13006	8.90728	7.1443	2.64666	low
TCGA-RC-A6M5	0.0410959	0	6.52609	6.9092	3.04082	5.40208	2.61048	7.29506	4.89806	4.33575	5.55886	4.2066	8.26729	7.33146	2.51663	low
TCGA-DD-A11B	0.0383562	1	7.0943	8.11201	2.87834	4.87835	2.98873	7.70349	3.73986	4.91228	7.01481	4.34158	8.36507	7.71063	2.54719	low
TCGA-G3-A25V	2.35616	0	6.84603	7.47595	3.17408	5.37646	4.61382	8.15742	4.89855	4.80587	7.37956	4.53251	7.96069	7.22841	2.7251	low
TCGA-BC-A10S	3.89863	1	7.39906	8.36163	3.13707	5.60568	2.67867	7.78658	4.5986	5.03048	6.11775	4.886	8.5477	7.84081	2.67482	low
TCGA-DD-AAEB	1.30959	0	7.24807	7.95074	2.86008	5.1196	3.49497	7.27754	3.92574	4.90489	5.37581	4.10759	7.31767	8.11292	2.50551	low
TCGA-5R-AA1D	1.23014	0	5.99419	5.39816	2.83612	4.83415	2.96549	7.94	4.76814	4.53357	6.31287	4.3061	8.63834	7.6239	2.66171	low
TCGA-G3-AAV0	1.30411	0	7.38061	5.9077	2.74153	5.60009	1.52508	6.74209	4.67284	3.93095	5.0599	4.26416	6.96935	6.06649	2.13914	low
TCGA-DD-A73F	2.9726	0	7.29706	8.05079	4.09635	5.08354	3.64774	8.01968	4.69222	4.4537	5.81234	5.17086	8.34561	7.38941	2.66199	low
TCGA-DD-AAEI	4.19452	0	7.52039	7.42841	3.04016	5.32413	5.11852	6.91942	4.84188	4.64828	7.98691	4.73263	8.57276	7.8425	2.76839	low
TCGA-UB-AA0V	0.860274	0	7.86562	8.88343	3.02146	5.84954	2.94323	8.13481	4.19151	4.70578	6.23798	4.24097	7.89205	6.46942	2.388	low
TCGA-DD-AADO	1.2411	0	3.37238	6.7655	3.51257	5.02235	1.84065	6.07395	5.06324	4.39597	7.09992	5.4825	8.14091	8.04993	2.8036	low
TCGA-DD-AAVY	5.39726	0	6.49963	8.57345	3.77162	3.78756	4.41062	7.7038	4.7028	4.15012	8.50664	5.34968	8.50129	6.79281	2.64827	low
TCGA-FV-A3R3	1.00274	1	5.35369	7.03737	3.34023	5.76663	2.60657	7.60782	4.8855	4.76847	5.42051	4.49154	8.51957	7.89129	2.75777	low
TCGA-DD-A4NS	6.72877	1	7.15065	8.33281	3.32075	5.39678	3.55319	7.5939	5.12185	5.09566	6.96019	4.77551	8.23122	7.8096	2.79221	low
TCGA-MI-A75H	2.04658	0	7.49347	7.87941	2.92405	5.52668	3.9538	7.1901	4.59351	5.34777	6.80359	4.74528	7.9073	8.26497	2.79097	low
TCGA-DD-AAEG	1.96986	0	7.51137	6.50819	3.07713	6.73831	4.02054	7.99959	5.3676	4.51816	7.53315	4.89784	8.17129	8.11732	2.70472	low
TCGA-K7-A5RG	1.42192	0	7.41599	4.88503	3.30343	3.89303	2.92886	6.68461	5.00049	5.41916	7.72805	4.54377	8.50483	7.79063	2.91466	low
TCGA-DD-AACY	3.9726	0	7.32245	7.61471	2.82531	6.00474	3.33466	7.18106	4.52198	3.9819	6.56149	4.47881	8.55941	6.5548	2.3784	low
TCGA-CC-A9FU	0.003	0	2.75478	3.26697	4.25594	3.85093	2.17739	5.84374	5.37947	2.73637	7.14505	6.34608	8.85701	8.85947	2.72934	low
TCGA-BC-A3KF	0.0219178	0	7.29104	7.8187	3.75621	6.05284	1.67816	6.42113	5.44968	5.25431	6.06969	5.03468	7.9661	8.40943	2.81198	low
TCGA-UB-AA0U	0.89589	0	6.84333	6.55082	4.04472	5.14136	3.52138	8.32966	5.24079	4.77667	6.78441	5.0023	8.17656	8.00677	2.83588	low
TCGA-DD-AAEE	2.21918	0	7.23897	8.18349	4.168	4.08036	4.58578	7.38241	4.82834	5.15155	6.15501	4.31682	8.20131	8.06514	2.8972	low
TCGA-ZP-A9D0	2.98904	0	7.66289	7.98728	2.56748	5.2455	2.59423	6.70212	4.03975	3.77229	6.68795	4.80193	8.35609	5.85181	2.17251	low
TCGA-RC-A6M4	0.060274	0	6.87384	9.99141	4.47113	4.69535	2.7318	8.19065	4.70488	4.42947	7.54318	5.42205	8.37047	7.0214	2.61324	low
TCGA-DD-AAE2	1.74795	0	8.01748	8.54907	3.58266	6.15888	3.76653	8.28871	4.81503	4.423	7.10933	4.06262	8.20402	6.31321	2.47635	low
TCGA-DD-AADF	0.315068	1	4.99065	4.47189	2.5659	4.11916	2.1565	6.79962	4.65817	5.51039	6.15073	4.63041	7.60355	8.93308	2.89943	low
TCGA-2Y-A9H1	3.36712	1	7.0632	7.4841	3.08943	4.88202	2.92613	6.81291	4.55792	4.39213	7.27585	4.24331	7.44125	8.25266	2.46605	low
TCGA-DD-AAD2	1.80274	0	6.44053	6.72029	3.67012	4.57866	3.96637	8.05492	5.28488	4.84016	6.5214	4.83678	8.70393	7.53565	2.89035	low
TCGA-BC-A10R	0.843836	1	7.29733	4.86383	3.11096	5.3899	3.00486	8.24092	5.57883	5.92668	7.35792	4.66319	7.58516	5.55553	2.91778	low
TCGA-G3-A5SL	1.70137	0	7.74585	9.39918	4.86313	4.75638	1.65834	7.54068	4.84426	4.60066	6.22382	5.17341	8.06285	7.01242	2.5708	low
TCGA-2Y-A9GV	6.93699	1	6.60787	7.44235	3.25863	6.06484	5.57993	8.61287	4.578	4.76006	6.69	4.64174	8.10471	6.68185	2.75383	low
TCGA-ED-A7XO	1.16986	0	7.21769	7.53729	2.82076	6.45708	1.97027	7.53143	5.12422	4.92998	5.61433	4.35333	8.75802	8.59536	2.67148	low
TCGA-DD-AAVQ	7.47397	0	4.96106	8.08504	3.47259	5.09233	2.20998	7.59297	4.9484	4.33587	5.20813	5.22638	8.96218	8.20985	2.71852	low
TCGA-DD-AAC9	0.950685	0	8.02683	8.43286	3.54578	5.88131	4.48759	8.02258	4.72938	4.75032	7.55665	4.40005	8.50296	7.51624	2.687	low
TCGA-ZS-A9CF	6.60822	0	6.07562	9.23192	3.71701	5.65719	2.11407	7.46239	4.58532	4.13653	5.74403	4.85805	7.82854	7.46789	2.43384	low
TCGA-NI-A8LF	2.18904	0	7.37364	9.07325	3.76567	5.67172	4.39866	6.80474	4.72944	4.92953	5.68486	4.11594	6.73011	7.82646	2.62906	low
TCGA-DD-A39Z	1.64658	1	7.23666	3.63991	3.54075	4.56737	2.054	7.33284	4.9977	4.55751	5.50837	4.95944	7.66192	6.71547	2.59211	low
TCGA-G3-A7M5	1.22466	0	8.3862	7.2557	2.75978	6.05153	3.1429	6.91175	4.25318	4.81677	5.4419	4.63209	7.42402	8.03642	2.47641	low
TCGA-MI-A75G	1.91233	0	8.23093	7.54708	3.37384	4.35981	4.01981	7.25488	4.87519	5.12199	6.67608	4.40105	8.23159	7.78913	2.75817	low
TCGA-ZS-A9CE	3.4	0	7.59658	7.61413	3.09947	6.14618	4.5623	6.57497	4.75947	4.72701	5.83943	4.86353	7.34258	7.91774	2.65138	low
TCGA-DD-A73B	0.775342	1	7.72606	8.43553	3.94639	5.76539	2.38512	6.94619	4.32001	5.35876	6.94207	3.99468	9.80124	7.47097	2.82246	low
TCGA-DD-A3A3	1.46575	1	6.25655	6.968	3.66112	5.48278	2.74738	6.92053	4.97148	4.41268	6.0243	4.72471	8.13062	8.1501	2.66554	low
TCGA-DD-AAEK	2.92329	0	7.12769	8.40816	4.00528	5.30385	3.82956	7.16867	4.42301	4.42526	6.35678	4.66969	7.89719	8.04596	2.61201	low
TCGA-2Y-A9H7	3.2	0	5.87442	5.6598	4.15301	5.01917	1.48371	7.67084	3.84829	4.93767	6.3862	5.12254	8.84832	8.72719	2.8042	low
TCGA-RC-A7S9	1.75342	0	6.55657	6.03248	3.42055	5.23605	2.41797	7.07892	4.6016	5.2887	5.88197	4.26931	7.89253	7.15188	2.74413	low
TCGA-DD-AAW2	5.08219	0	8.42246	8.69477	3.38828	4.45521	2.9133	7.86807	4.61874	5.09231	7.34168	4.92749	8.12014	7.60142	2.62979	low
TCGA-2Y-A9H6	0.978082	0	7.26468	7.7861	3.07396	5.53077	2.7083	7.6497	4.08446	4.83442	6.40298	4.62758	8.83365	6.16727	2.54933	low
TCGA-DD-A73D	1.89863	0	6.71694	9.42644	3.72753	5.12713	1.40195	7.49477	4.34086	4.05222	7.29424	5.04188	7.81998	7.94555	2.34144	low
TCGA-DD-A115	6.96438	1	7.70647	7.28218	3.74697	5.02743	4.39313	7.86802	4.70141	4.84729	7.65712	4.95711	7.99482	8.10523	2.77323	low
TCGA-XR-A8TF	1.89863	1	6.57807	8.25477	3.16901	4.82526	1.60837	7.87104	4.75479	5.15302	5.06704	5.56119	8.08453	8.47007	2.7151	low
TCGA-DD-AADU	1.51781	0	2.84223	7.59004	2.67092	4.43074	4.30132	6.18399	4.09246	4.54949	6.86484	4.12231	9.15695	7.26236	2.83493	low
TCGA-DD-AAE1	1.51233	0	6.71092	8.38084	3.79943	5.13585	2.58892	6.79352	3.95019	5.11833	7.3445	5.28182	8.84467	8.55799	2.81285	low
TCGA-2Y-A9HB	0.712329	0	7.53382	8.63068	4.18509	5.36215	4.47896	8.1276	4.67444	4.57856	6.88963	4.75245	8.06298	6.6383	2.65704	low
TCGA-BD-A2L6	3.73425	0	8.29335	6.184	3.09065	6.00089	3.33228	8.66159	4.86826	3.10991	5.77271	5.03791	7.97155	7.8106	2.18992	low
TCGA-DD-A3A9	2.55068	1	7.43767	5.92983	3.54803	4.20479	2.08631	7.51277	5.15579	5.48491	6.19604	5.45749	8.37711	6.237	2.85087	low
TCGA-KR-A7K2	2.27123	0	7.83795	6.85993	2.93164	5.55325	2.64101	7.34947	4.66679	4.67059	5.23835	3.9143	8.94338	9.04005	2.60997	low
TCGA-ED-A66Y	0.810959	1	4.93326	4.24024	3.79668	3.89183	1.76588	6.15179	5.61013	5.14073	5.51886	4.8895	8.79062	3.90542	2.90522	low
TCGA-DD-AAE3	1.55068	0	8.15859	8.11915	2.47268	4.3337	2.00789	7.59927	4.03122	4.62008	5.65318	4.57793	9.46069	8.65487	2.48077	low
TCGA-FV-A496	0.0273973	0	6.91077	4.86264	4.18058	5.07338	4.66043	7.22801	5.25216	3.52529	7.59483	4.74325	7.5636	5.76314	2.50577	low
TCGA-CC-A7IF	1.77808	1	7.60334	7.25926	3.67211	4.75116	2.14872	6.22465	4.59488	4.3527	5.57821	4.48668	7.4441	8.20915	2.44968	low
TCGA-DD-A1ED	6.30411	0	6.81135	8.41493	2.75702	5.4286	3.8777	8.57338	3.78942	4.26079	5.68676	4.06993	7.88933	6.86451	2.33678	low
TCGA-EP-A12J	1.56164	0	8.17109	8.63715	3.90482	5.42324	1.62816	7.69104	4.27588	4.27103	6.66999	4.5094	7.47239	8.16051	2.3121	low
TCGA-G3-AAV2	1.01918	0	7.96475	6.95746	3.28119	5.14684	2.97737	6.13236	4.75689	5.05957	5.90018	4.78921	8.98367	6.93874	2.74995	low
TCGA-DD-AADP	1.25479	0	6.92219	7.94465	4.2871	4.52101	2.37958	6.56123	4.58356	5.05241	6.24551	4.98877	8.32889	8.44348	2.81516	low
TCGA-BC-A69I	1.06027	0	7.739	8.28919	2.90079	5.02292	1.90168	8.40609	4.317	4.42534	5.12064	4.62809	7.42675	8.37496	2.31528	low
TCGA-BC-A110	5.79726	1	7.1461	6.95505	2.39108	5.98428	2.84613	8.14553	4.30266	4.86316	6.20352	4.38843	7.69949	8.02281	2.50842	low
TCGA-G3-A25U	4.48219	0	6.19008	8.35337	3.65121	5.41557	2.34354	6.92924	4.36349	3.69223	5.41091	4.72405	8.43015	7.39243	2.36899	low
TCGA-DD-A4NL	4.68767	0	7.71639	8.64178	3.17114	5.9109	3.56147	8.15883	4.14916	4.05648	6.59513	3.93422	7.66273	6.50024	2.24854	low
TCGA-2Y-A9GU	5.31233	0	7.83528	7.93353	3.46648	5.91524	3.1595	7.86187	4.4562	4.40382	6.82819	4.77599	8.75264	4.9252	2.45236	low
TCGA-ZP-A9CV	2.98082	1	8.12015	8.26401	3.63787	5.56069	4.74937	8.69237	5.38176	4.50064	7.33712	4.57134	8.86742	7.77801	2.73883	low
TCGA-2Y-A9GT	4.44932	1	7.43743	7.81776	3.62292	4.49886	2.74524	8.15176	4.10449	4.37435	6.43142	4.00934	7.87558	7.01725	2.38489	low
TCGA-DD-A73A	1.99452	0	7.68965	8.16654	3.67468	4.599	4.16345	6.94914	4.81798	4.32396	7.62635	4.45453	8.29608	7.42589	2.59708	low
TCGA-DD-AADG	3.13699	0	8.17359	8.40451	4.63856	5.16254	1.5446	7.63621	4.66484	4.74568	5.36266	4.91025	8.03101	7.36128	2.56043	low
TCGA-2Y-A9H4	3.97808	0	7.5362	7.07989	2.92526	4.50363	1.92904	7.2694	4.29888	4.87347	6.53473	3.96443	7.87376	8.2421	2.48923	low
TCGA-3K-AAZ8	1.08493	0	7.99727	5.50685	3.46031	5.26844	3.11084	8.4755	4.61456	4.77871	7.32349	4.97271	8.97801	7.90853	2.73393	low
TCGA-2Y-A9H5	1.52055	1	6.51854	6.50656	3.61286	5.41914	1.86029	7.20885	4.95888	4.79926	6.45906	4.58923	8.84322	8.8398	2.77515	low
TCGA-DD-AACD	1.04384	1	7.62148	5.42276	3.11805	4.26587	2.57563	7.7964	4.38189	5.04923	5.5727	4.57134	8.00253	7.18696	2.62259	low
TCGA-DD-AAD8	3.33973	0	7.82905	6.49352	3.21649	5.1301	4.5998	6.61688	4.53305	5.18032	7.82721	4.85003	8.12828	8.75151	2.87292	low
TCGA-5R-AAAM	0.126027	1	6.68844	7.50049	3.45516	5.57479	3.80396	8.36887	4.66193	4.79735	7.02171	4.786	8.63106	6.96869	2.73616	low
TCGA-DD-A73G	9.52877	0	6.93504	5.99502	3.27077	6.48009	1.99174	7.03196	5.06417	4.79639	5.63071	4.89891	7.68074	5.33849	2.54913	low
TCGA-DD-A73C	1.92055	0	7.07805	1.56247	4.20997	6.82047	5.48353	8.68912	5.12731	4.71581	6.4008	4.48653	8.49278	4.78283	2.92216	low
TCGA-MR-A520	0.627397	0	7.27624	5.76535	3.47875	7.27934	5.03521	8.10895	4.43359	4.27247	5.69225	4.24234	7.65074	5.82016	2.51948	low
TCGA-WX-AA47	1.52329	1	5.81543	2.45255	2.94078	5.23869	2.51788	5.8468	4.50232	3.96191	5.31921	4.3398	7.36354	6.11023	2.41856	low
TCGA-DD-A3A4	1.67671	1	7.23979	7.37948	3.49981	6.17387	3.48545	7.88934	4.76777	4.65189	7.43033	4.92571	8.57284	5.94043	2.63981	low
TCGA-DD-AADQ	1.19452	0	7.17797	5.7442	2.93985	4.54741	2.22102	7.57797	4.72737	4.91363	6.15142	4.03065	8.1795	6.31053	2.55669	low
TCGA-WQ-AB4B	1.08219	0	7.96694	6.9381	2.89496	4.87595	3.39247	8.06739	4.73163	5.27972	6.31433	4.41451	8.47327	8.5894	2.77193	low
TCGA-DD-A11A	0.216438	0	7.21569	7.40332	4.71688	5.22211	3.65053	6.84377	4.91636	3.89784	7.14424	4.64882	8.67395	6.20018	2.58603	low
TCGA-DD-A3A6	8.92603	1	1.38185	1.4456	2.54336	5.95007	2.99816	5.39683	5.07124	4.57774	5.57518	3.71531	7.25438	6.57706	2.85532	low
TCGA-HP-A5N0	2.06027	1	8.28321	7.13498	2.94931	5.37978	3.65445	7.65046	5.02157	4.63687	6.26013	4.55653	7.78044	7.2541	2.54019	low
TCGA-DD-AACT	4.27945	0	6.64375	6.39141	2.79196	6.00773	2.2223	7.9269	5.12363	4.54656	7.36674	4.41371	8.02968	7.95173	2.56207	low
TCGA-DD-A73E	0.120548	0	6.48137	7.212	4.18424	5.74004	4.24516	7.96414	5.0616	4.42106	7.2398	4.98796	8.49268	8.96151	2.85454	low
TCGA-XR-A8TG	2.46027	0	6.94423	8.72409	3.51011	4.51666	4.17902	7.91064	4.81192	4.83668	8.4367	4.58516	8.6101	7.7844	2.77534	low
TCGA-DD-AADJ	2.92055	0	7.07359	8.29564	3.56616	6.14744	4.68938	7.87561	4.43285	5.36603	6.80187	5.29776	8.19233	7.82726	2.9168	low
TCGA-2Y-A9H9	1.90959	0	7.07189	7.66684	3.35603	4.24907	1.87384	7.16047	4.57973	4.72049	5.52789	4.46757	7.79869	8.0979	2.52844	low
TCGA-DD-A4NV	6.56986	0	7.81098	6.8082	3.64715	5.66284	5.81637	8.31842	5.20708	4.50114	5.95798	4.42857	7.63164	7.73852	2.73139	low
TCGA-DD-AAD3	3.54795	0	7.41032	6.31474	2.87827	4.50953	4.57916	8.31277	5.3029	5.05903	7.10115	4.7594	8.19897	7.66721	2.83983	low
TCGA-DD-AACS	4.94247	0	7.94378	8.36028	4.02304	5.1131	5.27462	8.46503	5.30786	4.63454	7.37611	4.8466	8.1848	8.63659	2.83067	low
TCGA-BD-A3ER	3.05479	0	7.3062	6.55432	3.64243	6.04547	1.99125	8.63189	4.59018	4.84419	8.3702	4.54254	8.25929	7.40102	2.60864	low
TCGA-FV-A495	0.00273973	0	6.53754	6.4239	3.10096	5.87193	2.84962	7.83011	4.81951	4.95194	5.87287	4.76826	7.21597	8.29746	2.66991	low
TCGA-DD-AAEH	2.14795	0	8.042	7.6516	2.36892	5.47585	3.01657	7.83905	4.68553	4.92076	7.58257	4.53095	7.82777	5.29169	2.43186	low
TCGA-DD-A4NE	1.80822	1	7.65412	5.88904	3.91171	5.63619	4.37422	6.77469	4.77813	5.3368	7.70922	4.71609	8.17605	6.82888	2.9243	low
TCGA-DD-AADV	1.5726	0	7.11951	7.42996	2.77593	4.87509	4.21904	7.9716	4.81604	5.02494	7.28428	5.2333	8.32528	8.43082	2.81547	low
TCGA-G3-A5SK	2.03836	0	7.85996	7.75656	2.3688	4.61655	3.03748	8.73183	3.70487	4.5881	6.28476	3.98723	7.61658	5.61887	2.22037	low
TCGA-DD-AACV	4.19452	0	8.23182	8.91325	3.31534	6.29366	1.54536	6.63869	5.18493	4.91063	7.27962	5.15471	8.61785	8.64391	2.65232	low
TCGA-G3-A7M7	0.989041	0	5.79813	6.68407	3.11007	4.95117	4.61526	8.72319	5.25665	4.67561	7.27717	5.07728	9.22023	7.33523	2.91329	low
TCGA-G3-AAUZ	1.31507	0	7.12349	8.60503	3.19668	5.73632	2.15857	7.06694	4.56923	4.21165	4.85889	4.50384	7.8481	8.62348	2.40114	low
TCGA-RC-A7SK	1.29315	0	8.12377	6.20639	3.42102	6.25511	5.77117	7.73949	5.05312	4.80349	8.01701	4.8917	7.88255	8.55848	2.86074	low
TCGA-WX-AA46	2.07123	0	8.45126	9.03372	2.89377	5.8437	2.23597	8.18201	3.91324	4.49914	6.19263	4.35261	8.33467	7.2603	2.29269	low
TCGA-2Y-A9H2	4.74247	0	4.90206	5.49322	3.69347	4.23827	2.33635	5.83376	5.95172	4.49872	5.57022	5.07083	8.11716	6.94687	2.83863	low
TCGA-DD-AAW3	4.47397	0	8.25846	8.36035	3.81849	4.96152	2.77197	8.08539	5.01072	4.72429	7.1907	4.61896	7.21489	7.54137	2.51605	low
TCGA-DD-A4NP	9.06301	0	7.27002	7.79776	3.16202	5.44665	4.27954	7.86947	3.97293	4.06178	5.31927	4.15172	7.74896	7.05946	2.35834	low
TCGA-G3-A6UC	1.83836	0	8.23915	8.894	3.2193	4.8951	1.43735	7.6733	4.4921	4.14737	5.46112	4.48252	7.93816	7.24467	2.22181	low
TCGA-ZP-A9D4	1.08219	0	6.08766	8.67338	4.38201	4.70305	3.71444	7.61025	4.44841	4.37208	7.13195	4.78449	7.95414	7.11813	2.64422	low
TCGA-DD-AAE6	0.386301	0	7.78814	1.54702	4.0761	6.7822	2.6164	6.00248	5.40617	3.70735	7.12483	5.38884	7.46681	8.18096	2.58846	low
TCGA-G3-A5SI	2.10411	1	7.25507	9.04964	2.71463	4.60435	2.18019	6.45251	5.54415	5.15393	6.76903	4.11038	8.67897	7.32194	2.6888	low
TCGA-ED-A7PY	1.06849	0	7.28327	8.44149	3.02947	5.9778	1.9156	6.24944	4.43539	5.34893	5.4992	4.88808	9.45673	7.91154	2.7871	low
TCGA-BC-A10X	2.10959	1	7.78274	8.61281	2.96332	6.24129	3.16653	8.08537	4.17222	4.78868	6.5899	4.36065	7.91513	6.43533	2.43559	low
TCGA-CC-A7IH	1	0	8.23233	9.00093	3.36852	5.53033	2.62732	7.13693	4.9831	4.77147	7.35566	4.31659	8.9073	7.47948	2.60077	low
TCGA-DD-A3A8	0.030137	1	8.47288	8.6669	3.32491	5.95016	2.44694	8.13171	4.31546	4.7098	5.15413	4.50016	7.94932	8.14131	2.44202	low
TCGA-DD-AAVP	7.53973	0	8.32633	7.82915	3.15914	5.14044	2.86888	6.811	5.4693	4.48228	4.69464	5.01348	7.09954	8.2589	2.50064	low
TCGA-G3-A3CG	1.84384	0	8.27077	7.1984	4.06222	4.68296	1.65759	8.13646	5.16544	5.6199	6.3231	4.91551	7.96593	4.99905	2.7168	low
TCGA-DD-A4NK	3.31507	1	7.91136	8.70946	3.29721	5.848	3.12951	7.35258	4.58636	4.31441	7.64499	4.49722	8.19883	6.01051	2.39385	low
TCGA-DD-A3A5	8.56164	1	8.34302	7.15562	2.34674	4.55381	1.6389	7.68088	4.22913	4.98166	6.64755	5.33491	7.94607	9.13175	2.50503	low
TCGA-NI-A4U2	4.90685	1	8.34263	2.55515	2.95081	5.70634	6.22695	8.52253	5.00221	4.6971	5.08892	4.47967	8.0899	5.14054	2.7419	low
TCGA-DD-A4NF	2.58082	0	7.79915	9.35049	4.04243	5.39945	3.65837	7.95488	4.16656	5.24847	6.71366	4.56553	9.33737	6.98226	2.80174	low
TCGA-BC-A10T	2.29315	1	6.86309	8.3946	3.97897	3.96381	2.33481	7.50176	4.68653	5.19385	6.80521	5.23661	8.4115	7.07177	2.78372	low
TCGA-DD-AAE7	1.76438	0	7.25003	7.9253	2.60779	5.31836	2.78595	8.34575	4.26536	4.55971	6.47249	4.23334	8.43483	7.04699	2.42848	low
TCGA-DD-A3A2	5.83836	1	7.34982	3.24849	3.55939	6.37	5.20695	8.32716	5.00749	4.54857	4.94059	4.30698	7.55401	3.85872	2.62922	low
TCGA-DD-AAVR	6.88493	0	7.45678	8.15699	2.74364	5.80298	3.0717	7.98221	4.96763	5.25505	7.81497	5.03864	9.61762	6.35886	2.80205	low
TCGA-DD-AACN	3.56712	0	6.19034	8.85609	3.10995	5.24303	3.32283	7.26082	5.25561	5.17685	6.63083	5.22001	8.21649	8.15281	2.86771	low
TCGA-DD-AACQ	1.18356	1	7.7619	7.16972	4.09101	7.06197	6.30813	8.11797	5.33622	4.30459	9.23013	4.74292	7.66809	6.90453	2.75497	low
TCGA-RC-A7SF	1.5863	0	7.01458	7.75704	3.63666	4.64349	4.60627	5.57362	5.08645	4.81004	7.43335	4.10965	8.10932	7.87213	2.81585	low
TCGA-G3-A3CH	2.13699	0	7.94629	7.20768	3.54605	5.89479	3.26076	7.51478	4.55903	4.64104	6.94897	4.64368	7.70592	8.04696	2.57219	low
TCGA-BC-A10Y	1.94795	1	6.30307	9.11404	3.14231	4.93819	1.74605	7.74596	4.43812	4.50279	5.88743	5.39904	8.10502	7.64509	2.48973	low
TCGA-ED-A8O5	1.11233	0	5.91966	2.36838	2.97143	5.57659	1.97243	6.16725	4.14841	4.96252	7.58373	5.21371	8.65616	6.1473	2.76396	low
TCGA-CC-A9FS	0.578082	0	7.94181	8.64708	3.13368	4.17355	1.76546	6.92157	4.38543	4.51801	7.12603	4.92447	8.67661	8.3659	2.48107	low
TCGA-ED-A627	1.1589	0	7.16522	7.77258	2.89961	5.79902	3.03415	8.14947	4.88727	5.1866	5.79484	4.84869	8.26351	7.76976	2.73393	low
TCGA-K7-A5RF	1.72877	0	7.92446	8.99146	2.53257	6.19628	2.99325	7.82892	4.30441	4.60349	6.31155	4.3055	8.08445	6.77921	2.36392	low
TCGA-DD-AACE	5.98356	0	6.82175	6.72249	3.47637	5.39905	3.73489	7.60798	5.00806	4.83598	6.30887	5.35132	7.32689	5.58745	2.6659	low
TCGA-2Y-A9H3	4.15342	0	5.97526	6.22662	2.58371	5.9689	2.54676	6.36103	4.64294	4.98651	5.6533	4.71886	7.95051	7.67689	2.6909	low
TCGA-DD-A4NB	2.70959	0	6.42474	7.9478	3.2132	4.85988	4.33257	7.86884	4.95955	4.84143	7.40992	4.27099	8.41187	6.69683	2.74456	low
TCGA-EP-A26S	1.66575	0	8.18683	8.04008	4.07575	4.97787	3.05786	8.7506	4.25291	4.97093	6.65598	5.00086	8.57488	6.11905	2.63061	low
TCGA-DD-AAVX	4.70685	0	6.78682	8.32479	3.25376	4.38889	2.03207	7.46189	4.51732	5.06875	6.61188	4.60025	8.96303	8.04495	2.71217	low
TCGA-ED-A7PZ	0.0164384	0	3.91793	5.89231	3.79421	5.7834	1.94367	8.14373	5.97504	4.77715	6.82813	5.82109	7.3814	7.24534	2.89707	low
TCGA-UB-A7ME	1.33151	0	6.95448	6.21041	3.31645	6.4177	2.15912	8.97815	5.00174	5.34326	5.27517	5.38124	8.46313	8.5565	2.86731	low
TCGA-LG-A9QD	1.00274	0	7.75584	8.09924	2.99513	6.25112	2.27224	7.83626	4.46343	4.08743	5.48327	4.16287	8.14239	6.69733	2.25798	low
TCGA-ZS-A9CG	0.934247	0	7.47251	9.09743	3.09503	5.8562	2.96329	6.8124	4.33186	4.37822	6.24759	4.57352	9.41024	8.93663	2.5858	low
TCGA-K7-A6G5	1.40274	0	7.69646	7.95586	3.19397	5.04599	3.47413	7.8948	5.20053	4.81957	6.13125	4.34181	8.31626	7.13136	2.64691	low
TCGA-DD-AADS	1.29863	0	8.25677	7.19597	2.47131	4.37462	1.55771	6.74	4.16819	5.25437	3.81826	3.62293	7.19402	7.91948	2.39168	low
TCGA-DD-AAW1	5.44932	0	8.00977	9.23695	3.907	4.15639	1.47478	7.06567	4.05518	4.05723	5.68682	4.45137	8.7973	7.37815	2.30556	low
TCGA-DD-A118	9.41644	0	8.06327	7.25981	3.41281	4.85049	1.80856	7.41717	4.83922	4.81409	7.73688	5.24819	9.1105	5.22347	2.57963	low
TCGA-DD-AADA	3.37808	0	7.49709	7.84952	2.51695	5.2106	2.77652	6.4889	4.64195	4.61016	7.06718	4.58463	8.57728	5.48737	2.45679	low
TCGA-G3-AAV1	0.983562	1	6.92879	7.5797	4.15325	3.9871	1.76428	6.79244	5.48478	5.06461	7.28625	5.55251	9.0626	7.52146	2.90953	low
TCGA-O8-A75V	1.47397	0	6.95835	7.78025	3.63103	5.53707	2.09409	7.45274	5.52711	4.96425	7.35728	4.88271	9.16307	7.94968	2.83947	low
TCGA-ZP-A9CY	2.14247	0	7.88694	7.83592	3.37996	5.38944	3.44446	8.53477	4.40509	4.6784	6.77608	4.25003	8.13881	7.61228	2.53966	low
TCGA-G3-A7M8	1.17808	0	6.93664	8.12273	2.9544	6.79617	4.1537	7.70119	4.55907	4.54489	5.85848	4.3632	8.54378	6.63688	2.58182	low

## Sheet: Table S7
Table S7. The risk scores and risk of HCC in GEO database
id	futime	fustat	PON1	CYP2C9	ACACA	ACADS	ME1	ACAT1	ELOVL1	SMS	UGDH	ADSL	HSP90AA1	S100A10	riskScore	Risk
GSM362958	2.31781	1	6.67368	3.52443	4.19039	4.81217	1.82994	6.70601	5.19188	5.56538	6.56349	5.53556	8.1127	8.67834	3.0872	high
GSM362959	0.780822	1	4.55656	5.69774	4.58358	5.56839	3.3823	6.99809	4.50091	5.98554	6.84054	6.69535	8.68793	8.72668	3.42638	high
GSM362964	5.53973	0	7.07607	6.9204	3.53994	4.6526	2.5244	7.40193	5.638	6.01303	6.45456	5.23841	8.09805	8.02658	3.08407	high
GSM362965	5.47397	0	7.54909	4.76688	3.92824	5.14193	4.5179	7.85505	5.03113	5.97712	6.59122	5.30936	7.8639	8.75423	3.20669	high
GSM362982	5.30959	0	7.16254	6.01328	3.81663	3.54471	6.20838	6.8972	5.30901	5.27109	7.96339	5.42012	8.21405	9.63447	3.22034	high
GSM362983	5.27671	0	2.45299	6.20217	4.14135	4.81217	2.12222	7.33303	5.43212	5.3658	6.13137	6.57301	8.48531	6.968	3.23566	high
GSM362986	5.30137	0	6.70103	7.77172	4.1261	4.32503	4.18879	7.09291	5.13027	5.34873	7.76038	5.44532	7.97632	8.19626	3.03556	high
GSM362987	4.96438	0	5.282	3.63135	3.44223	4.34165	3.03254	6.63831	5.73029	5.68037	6.80443	5.16402	8.17495	7.39278	3.18697	high
GSM362992	5.28493	0	7.85483	7.66513	4.4851	4.56897	6.14384	7.34189	4.85503	5.28953	8.0487	5.17371	7.88865	7.17553	3.03025	high
GSM362993	0.312329	0	5.16805	5.85809	3.01067	5.63802	2.50851	6.5808	5.82205	5.8588	5.62552	5.49368	8.5939	8.72148	3.22417	high
GSM363008	4.8	0	6.00439	7.54214	3.65926	5.44652	3.4603	7.05496	5.02646	5.91661	5.82188	4.96433	8.54415	8.61733	3.16116	high
GSM363009	4.8411	0	5.80178	6.46069	3.48227	3.94701	4.55368	6.5781	5.25347	6.75309	6.59275	5.14459	8.98402	9.4253	3.56748	high
GSM363011	1.44658	1	6.12565	4.35531	4.36053	4.68676	4.30318	7.24179	5.39217	5.37418	6.79164	4.85852	9.28689	9.02323	3.29763	high
GSM363013	0.632877	1	3.41745	6.96795	4.07773	4.98564	4.79378	7.46411	5.26014	5.98697	7.90885	5.91937	8.31397	7.63181	3.4557	high
GSM363017	1.04384	1	6.12166	7.77395	3.40588	4.99351	5.63699	7.31507	4.39954	6.30046	7.55593	4.78256	8.09805	7.68064	3.23213	high
GSM363029	4.21644	0	7.47537	6.75747	3.76427	5.01867	4.7277	7.57996	5.77909	5.3086	7.24255	5.17238	7.49126	8.73189	3.02579	high
GSM363030	0.369863	1	2.80703	5.49428	3.54526	3.90463	2.39863	6.65171	4.60588	6.00193	6.17829	5.18483	8.08367	7.68064	3.22814	high
GSM363032	2.04658	0	3.07135	5.34952	4.2778	4.61352	4.07333	6.39018	4.67843	6.36122	6.80989	6.04264	7.7702	7.59199	3.50037	high
GSM363033	2.99178	1	4.65159	2.68203	4.78225	3.92744	2.53934	4.06311	4.20913	4.73596	7.3308	5.92781	8.74203	6.95735	3.05249	high
GSM363037	5.03014	0	7.2183	5.11995	4.59846	4.22499	5.12674	6.91277	5.63006	5.56311	7.15174	5.646	7.85755	7.26103	3.23088	high
GSM363038	1.2411	1	7.36943	4.01847	3.37115	5.87678	4.01212	5.68195	4.16653	5.30042	6.99939	5.05731	8.6675	8.09715	2.96866	high
GSM363048	1.66849	1	7.53674	6.0557	3.73726	4.51429	5.06301	7.63732	6.06824	5.32648	6.26449	5.40561	7.3516	9.32982	3.10455	high
GSM363051	1.69315	0	6.94832	6.45364	4.5207	4.93689	6.00548	6.00611	3.19826	6.33586	7.73457	5.42711	7.56787	6.73444	3.21397	high
GSM363052	1.17534	1	6.79574	4.05974	3.91879	2.73053	5.19032	5.92516	5.80794	6.07532	8.05307	5.31071	9.27308	7.93294	3.51139	high
GSM363054	4.42192	0	1.95901	2.18004	2.52109	5.91182	3.92503	8.08458	5.68041	5.95628	3.06643	4.56634	9.31289	4.0365	3.34335	high
GSM363055	0.6	0	2.74048	3.15775	2.56899	4.13818	2.28248	3.69853	5.32831	5.96547	4.09058	4.74043	9.27308	8.53899	3.39056	high
GSM363056	1.57808	1	3.94474	4.7619	3.53663	5.13358	3.75862	6.3764	5.50294	5.21466	7.21265	4.69665	9.23309	9.18238	3.27425	high
GSM363057	4.9726	1	5.98218	8.23255	2.92503	4.72904	4.98735	7.40437	4.80004	5.0643	7.01361	4.42567	8.81005	9.02323	2.95077	high
GSM363069	1.11781	1	3.47469	5.28991	3.39161	4.72346	2.55719	7.99127	4.77843	5.63994	6.76124	5.79126	8.21405	7.80942	3.14609	high
GSM363070	4.68493	0	2.54288	2.13545	4.60974	4.37406	5.74611	6.32947	4.6206	6.90944	7.83682	5.86935	8.84261	8.68865	3.98809	high
GSM363071	1.13425	1	6.61014	4.70186	4.82797	5.43797	4.62097	8.07618	5.84283	5.18175	7.31599	5.37301	8.08367	8.71064	3.21899	high
GSM363072	0.854795	0	6.82916	6.63563	4.00793	5.08401	4.70172	7.41925	4.92393	5.31472	5.67223	4.49176	8.67706	6.10941	2.9718	high
GSM363077	4.33151	0	2.65444	5.80162	3.78941	6.23629	2.47585	7.14428	3.82853	5.59781	6.26449	4.89118	8.79833	4.69391	3.01084	high
GSM363078	4.7589	1	3.15053	8.01342	3.57227	4.76407	5.46469	7.41925	5.12433	5.41236	7.67733	5.10143	8.63617	7.25516	3.25773	high
GSM363079	0.641096	1	5.16398	6.77919	4.42736	4.79723	3.54911	6.61017	4.99225	5.41195	6.54124	5.4322	9.13651	7.31117	3.18952	high
GSM363080	0.189041	1	6.02318	2.33681	3.58879	5.2341	3.7969	5.19547	4.39297	6.56737	7.63912	5.01794	9.67693	7.68064	3.49887	high
GSM363081	0.427397	1	5.16243	3.85288	3.17181	5.60728	2.68791	5.92516	5.95643	5.36291	8.85424	4.40551	9.46414	8.18009	3.19363	high
GSM363082	4.68493	0	6.94965	4.44835	3.65897	4.87442	5.37167	7.48873	5.61843	4.77778	6.40974	4.94626	8.06149	6.72548	2.94632	high
GSM363083	4.38082	0	3.93584	4.98007	3.46421	4.25026	3.31852	5.82849	5.59641	5.50232	7.71485	6.27182	8.91046	5.98316	3.26669	high
GSM363084	5.14521	0	7.74405	7.59318	3.85254	5.34376	5.64489	7.1396	5.70996	5.36762	6.69817	4.53381	8.53457	7.37878	3.07438	high
GSM363085	4.50411	1	2.12054	2.25963	3.8636	4.58035	2.96002	5.4982	4.81202	6.09259	6.78101	6.12261	9.09998	7.24727	3.56997	high
GSM363086	4.9726	0	8.0253	7.0529	3.74482	6.34351	5.23992	7.48873	5.54656	5.13216	7.44501	5.11873	9.60849	8.20337	3.10719	high
GSM363100	0.279452	1	5.07107	3.84202	4.1158	4.1504	4.1938	5.33314	5.99119	6.68565	6.36142	5.69612	9.31289	10.5342	3.85034	high
GSM363102	3.11507	1	7.24443	7.87477	3.71983	5.3955	4.27337	7.63991	5.80756	5.27109	7.07493	4.6757	7.88865	7.74594	2.94349	high
GSM363105	0.780822	0	6.181	7.70009	3.30468	5.11985	3.21009	7.80063	5.2267	6.14027	6.46723	4.72745	8.5939	5.64037	3.05534	high
GSM363106	1.2	1	3.69897	7.62789	3.86618	4.87853	3.71631	6.44302	4.88837	5.65326	5.82064	5.17238	8.41878	8.64657	3.23987	high
GSM363107	0.575342	1	7.42804	4.63055	3.83172	6.16687	5.71295	7.2922	5.76345	5.7198	6.75617	4.76335	7.96274	7.41985	3.21952	high
GSM363109	4.53699	0	6.35103	4.40081	3.78512	5.20921	6.12861	6.62127	6.04803	5.96927	7.80893	5.05731	8.10507	9.84903	3.51737	high
GSM363123	3.50959	0	8.16786	5.31212	3.87997	4.89913	5.91247	7.51902	5.49771	5.39635	5.52516	5.71531	8.40163	8.31916	3.18568	high
GSM363126	4.89041	0	7.25814	6.51303	4.73538	6.05893	4.99836	6.76689	5.02051	4.44788	6.15489	4.26692	9.30029	9.69136	2.99428	high
GSM363127	1.82466	1	3.96642	5.08266	4.11344	4.24289	3.48481	5.19325	5.38442	5.36291	7.00754	5.34095	8.50935	8.34511	3.28415	high
GSM363128	2.47397	1	7.93464	6.3268	3.77108	6.10243	4.35374	7.89232	5.77748	4.79518	7.88579	4.31588	8.8769	9.15586	2.93872	high
GSM363129	0.287671	1	3.22399	3.47384	4.23853	4.42278	3.7799	5.97094	4.40132	6.55382	7.2466	6.2794	9.3274	6.11301	3.63138	high
GSM363144	4.2	0	6.45406	6.52732	3.31369	4.97744	4.48859	8.21638	4.99392	5.77746	7.59704	4.65736	8.84261	8.30118	3.14457	high
GSM363145	2.71233	1	2.31716	4.02639	3.01817	4.96078	3.38527	7.2504	4.17905	4.58745	6.69817	5.35766	8.46651	9.31418	2.99504	high
GSM363146	4.51233	0	5.30118	6.30622	3.27978	3.60567	4.8461	6.55004	5.9391	5.36548	6.52842	4.709	8.71966	6.61812	3.15547	high
GSM363147	2.3589	1	3.41597	2.08938	4.14466	4.55923	3.6435	5.90583	4.61583	5.55312	7.25169	5.65354	8.35837	7.78562	3.34865	high
GSM363150	0.271233	1	2.62637	3.72531	4.10917	4.44802	2.71295	5.0895	4.60332	6.33078	7.94328	5.69612	8.91046	7.78562	3.55154	high
GSM363166	4.42192	0	6.89943	5.54509	3.47722	4.09756	1.9605	6.44046	5.21876	5.79569	5.45155	4.60962	8.1127	6.86869	2.93028	high
GSM363169	3.23836	0	7.65573	3.66796	3.43261	5.16239	6.09849	7.279	5.08664	4.96513	8.50217	5.36076	8.15141	7.78562	3.03339	high
GSM363170	4.38082	0	7.15291	6.59071	4.41402	4.94042	5.58301	7.2922	5.51682	5.54397	7.63244	5.08028	8.13656	8.63635	3.23928	high
GSM363172	0.550685	1	7.47768	5.36633	3.4678	4.15906	5.18762	7.51902	5.63164	5.46487	7.4365	5.26404	9.03407	7.31117	3.16887	high
GSM363184	1.33973	0	2.22184	2.19974	2.96803	3.75473	2.49039	4.22551	5.81177	7.02448	6.57795	4.07062	9.12443	10.3928	3.81958	high
GSM363190	0.394521	0	5.18663	6.62095	3.82676	4.77644	5.12313	7.43336	5.56616	5.78393	7.51714	5.69807	8.54415	8.45274	3.38373	high
GSM363192	4.29041	0	6.89229	6.38706	3.94006	4.73728	3.70003	7.53902	4.76086	5.62758	7.26117	5.24203	8.64783	8.77641	3.10845	high
GSM363194	0.369863	0	4.88657	5.89632	3.85963	4.3422	6.08879	6.74897	4.76327	6.34672	8.1355	5.89386	8.50478	8.86743	3.58726	high
GSM363196	4.74247	0	7.22387	6.58647	2.89201	5.04773	4.90257	8.31507	5.02142	5.8435	6.43762	4.65856	8.05496	7.20626	3.00641	high
GSM363198	4.7589	0	6.06212	2.94712	5.18749	5.45937	5.2054	7.23155	5.49093	5.20591	6.83466	5.51107	8.0761	5.31446	3.22221	high
GSM363204	1.1589	1	5.63258	5.24996	3.46387	4.71023	2.04917	7.1155	5.48899	5.51773	6.53155	5.00093	8.89872	8.91506	3.10835	high
GSM363207	4.38082	1	4.57785	6.14938	4.13022	4.78924	5.107	6.76855	5.76643	5.78349	7.35851	4.92033	8.1822	9.59777	3.44776	high
GSM363217	4.47945	0	2.47248	3.11874	3.53332	3.98968	3.67062	5.8394	4.7001	5.7688	5.06254	3.49063	9.64385	6.89308	3.34464	high
GSM363218	1.24932	1	3.03992	1.90689	4.39566	4.36676	6.71135	6.24095	5.66154	5.1662	8.35991	6.14011	8.98402	10.7508	3.75348	high
GSM363222	3.97808	0	2.13763	3.48626	4.53009	4.59365	1.86514	6.0941	4.31865	6.37693	8.43989	6.16046	9.17794	6.33663	3.53095	high
GSM363235	2.69589	0	6.10886	6.32812	3.70786	3.6125	5.50766	5.12603	5.38656	6.19614	8.73256	5.65166	9.05952	8.84346	3.53909	high
GSM363237	4.72603	0	5.49877	5.15055	4.01888	3.81616	3.73309	6.48793	5.09766	5.46863	7.24255	6.54456	8.84261	5.30967	3.17556	high
GSM363239	3.46849	1	6.63327	7.20159	3.98032	4.96378	3.26956	7.97087	4.94169	5.33755	6.91989	4.67693	9.25875	7.36496	2.98342	high
GSM363245	4.72603	0	4.36377	3.02839	4.08983	3.92182	5.24527	6.18818	4.65451	6.34604	8.17136	6.45634	9.43387	7.75143	3.70696	high
GSM363247	4.34795	0	7.00735	7.1091	3.86042	5.81147	4.9844	7.3704	5.3347	5.21531	7.56754	4.87936	8.52415	8.56831	3.07	high
GSM363249	4.86575	0	1.79638	2.10564	4.31346	5.19302	2.39958	4.31058	3.97073	4.96803	7.52838	5.30728	9.20605	7.7917	3.23637	high
GSM363251	1.61096	1	7.29165	8.74368	3.61668	5.25009	4.6241	7.52901	4.92259	5.24885	7.35355	4.54269	8.60322	8.8616	2.94695	high
GSM363263	0.246575	1	6.50342	7.35518	4.2153	5.3302	5.65688	6.2376	5.63557	5.93615	9.28047	5.96451	8.5939	6.22576	3.37012	high
GSM363264	1.46301	1	6.17537	5.81334	3.93133	5.21323	4.63028	8.12489	5.19717	5.66886	6.65139	4.27773	9.08575	6.82211	3.16857	high
GSM363268	4.60274	0	5.38159	6.91073	4.48007	4.58268	5.82099	6.29686	5.2267	5.83071	8.65999	5.33938	9.08575	7.47444	3.45702	high
GSM363271	2.3589	0	2.67577	2.90979	2.70275	4.64956	1.95827	4.35263	5.01382	4.69557	6.80079	4.91033	10.0667	10.3143	3.17252	high
GSM363274	2.21096	1	6.4998	8.75644	3.89427	5.11129	3.27827	6.72378	6.25278	5.4472	6.57497	5.22179	8.64783	6.23649	3.04394	high
GSM363292	4.92329	0	5.84222	5.39648	3.14097	4.70771	4.39933	6.53444	4.90755	5.0246	8.57964	3.79254	9.88114	8.74278	3.06407	high
GSM363296	2.26027	1	5.36867	7.80627	3.77108	4.55762	2.45814	7.39724	4.62154	5.55191	6.94926	5.65742	8.69813	5.84655	2.95252	high
GSM363297	0.246575	0	5.26424	5.81448	3.83711	4.1128	4.58213	5.88767	4.6558	6.03863	7.42811	6.09206	9.21871	7.69211	3.42174	high
GSM363309	4.35616	1	5.60813	8.69066	4.15456	5.08198	4.4719	6.98104	5.20819	5.68402	8.5909	5.55658	9.02092	7.14066	3.23968	high
GSM363310	1.93151	1	5.61885	6.13786	4.34079	6.71438	4.61086	7.7917	5.03515	5.19515	7.20782	4.95567	7.46532	8.82178	3.06733	high
GSM363311	1.56164	0	6.91231	4.26037	4.31445	5.55231	3.89228	7.66935	5.14671	5.40202	6.39744	5.01532	8.64783	8.93884	3.16218	high
GSM363314	4.69315	0	6.34864	4.92352	3.53437	5.26302	3.43933	6.89019	4.48033	5.59824	7.19425	4.77699	8.98402	7.60536	3.05878	high
GSM363317	5.16164	0	5.59374	7.365	4.52716	5.62082	5.03922	6.56274	5.08726	5.71078	8.07893	5.55576	8.84261	7.50193	3.33488	high
GSM363329	4.3726	0	3.56776	9.04614	3.83362	5.06639	2.62363	6.36432	4.71419	5.12561	7.56117	5.70064	8.93497	6.00459	2.97366	high
GSM363330	1.03562	1	3.61697	3.18337	4.15036	5.72733	6.15821	5.62116	3.92826	5.35248	9.61556	5.4493	9.65986	8.04681	3.47533	high
GSM363332	1.03562	1	4.11381	4.0617	3.51313	4.99217	1.73989	6.94327	4.12752	5.29284	7.04735	5.32106	9.41784	7.10119	3.01924	high
GSM363333	1.10959	1	5.676	6.70184	3.92866	5.14639	4.12055	7.44867	4.93159	5.0275	8.38984	4.62826	9.09998	8.22225	3.03911	high
GSM363337	5.38356	0	3.31141	3.36411	3.52878	3.50151	4.87118	8.45678	5.44382	5.06203	7.1614	4.99833	8.77569	7.57866	3.25244	high
GSM363339	5.37534	0	6.49686	7.80198	3.48367	4.68005	4.45762	7.10366	4.57053	5.52313	8.5909	5.74124	8.19006	8.79925	3.06304	high
GSM363341	5.37534	0	6.14647	6.33984	4.50107	5.30448	5.05501	6.81118	5.17382	5.29318	7.70607	5.81323	8.93497	8.71064	3.28791	high
GSM363348	1.17534	0	4.97065	3.84202	3.646	4.13198	2.36947	6.9293	4.77739	5.91255	5.38335	5.94474	8.95877	10.0248	3.34036	high
GSM363350	5.16986	0	5.73739	5.01964	3.09957	3.51483	4.52336	7.11937	4.80037	5.70715	8.48034	5.82219	8.94694	9.29931	3.28726	high
GSM363352	1.33151	1	7.90507	6.70184	3.24043	4.34902	2.53983	7.44867	4.8587	5.73236	6.9723	4.73662	9.03407	9.0482	2.97248	high
GSM363354	0.854795	1	3.93784	2.0292	4.09065	3.88088	5.44014	6.33917	5.54863	6.24536	8.18825	6.28212	7.91501	9.25457	3.73452	high
GSM363355	0.747945	1	7.22624	5.71939	3.79285	4.1218	6.22804	7.01523	5.32219	5.2438	7.81573	5.27657	8.36681	10.0773	3.23587	high
GSM363358	4.43014	0	4.52213	3.33783	3.16977	4.7305	3.09063	6.86982	5.13419	5.40123	6.6057	4.96969	8.92239	7.41516	3.13802	high
GSM363360	4.38082	0	4.81967	5.73089	2.8271	5.31329	2.50208	6.83913	5.63363	6.02117	5.45068	5.27355	8.93497	8.77641	3.26928	high
GSM363368	1.26575	1	6.07948	3.985	3.18791	5.63954	4.90081	6.96441	4.53481	4.51686	7.00754	5.55576	9.03407	8.12702	2.9427	high
GSM363376	5.05479	0	5.87364	6.44568	3.63944	3.56744	4.77808	6.4485	4.54018	5.9608	6.72384	4.91808	8.69813	8.68865	3.26678	high
GSM363384	4.2411	1	3.93125	2.02419	3.8155	4.75599	4.7468	7.43336	4.082	5.15009	7.61513	5.47682	8.64783	9.769	3.28101	high
GSM363386	0.821918	1	5.73873	4.51518	4.39696	4.71986	3.22246	7.20961	5.19578	6.09371	5.61542	6.2794	8.61425	6.55747	3.34323	high
GSM363388	4.70959	0	3.69426	2.57498	3.10059	4.90107	4.19597	6.77207	4.93699	5.54485	6.3525	5.33801	8.76348	7.5309	3.29062	high
GSM363393	0.328767	1	5.23724	6.02703	2.31732	4.18272	2.60976	7.09666	5.075	5.52072	5.39624	4.54969	8.54415	8.44328	2.94588	high
GSM363400	4.56986	0	5.74102	7.42605	3.85963	5.40261	3.01812	6.78543	4.39593	5.40854	7.2466	4.32332	8.68793	8.73189	2.97302	high
GSM712542	0.616438	1	2.52326	3.01795	3.69235	4.01796	4.28951	4.80927	4.66987	4.7836	6.40383	5.67409	9.65986	6.85152	3.26878	high
GSM362960	5.43288	0	6.16314	5.18043	3.39795	5.08734	1.99202	7.54652	4.86591	5.49711	7.05312	5.99118	8.22188	6.72231	2.92687	low
GSM362966	5.43288	0	8.26086	7.365	3.84142	4.17648	2.50392	7.68105	5.31393	3.52199	7.06618	4.52225	7.26153	6.90399	2.2216	low
GSM362970	5.53151	0	6.23245	8.04189	4.26205	6.32288	1.96917	7.44867	6.77013	4.84204	5.51811	5.35457	7.59632	8.05416	2.88409	low
GSM362971	3.95342	1	7.5997	8.7347	3.15131	7.0642	2.16549	7.82629	4.74662	4.60546	4.37092	4.55177	7.57699	7.65339	2.42009	low
GSM362972	5.42466	0	9.06544	8.61662	3.26027	5.709	3.71064	6.69044	5.4415	4.44157	6.95342	4.709	8.1822	8.1618	2.57059	low
GSM362976	5.50685	0	7.60585	6.70633	3.07383	5.30776	3.28633	8.32427	5.23911	4.11397	7.35851	3.8226	8.56436	7.58393	2.48787	low
GSM362977	5.44932	0	8.58537	7.24468	3.55267	6.56001	1.96751	7.18133	5.39749	4.51686	5.77375	4.65796	8.24574	8.72148	2.5689	low
GSM362978	2.36712	1	8.18917	7.20861	3.06703	5.43797	1.81166	7.45881	4.79702	3.93667	5.68294	4.7229	7.88276	9.41005	2.33446	low
GSM362984	4.22466	0	9.40812	8.27925	3.12518	5.4899	1.97242	7.36565	4.32119	5.12818	5.94968	4.44195	7.20993	7.47716	2.39276	low
GSM362988	4.2	0	8.20651	7.7506	5.22605	4.56865	1.90498	6.71918	5.46732	5.03838	7.23761	4.97387	7.66713	9.14287	2.84528	low
GSM362994	4.50411	0	7.28763	7.81931	4.68209	5.51313	5.27261	7.93899	5.64273	4.40806	6.565	5.00344	7.39844	7.63993	2.81328	low
GSM363010	5.09589	0	7.06593	8.1854	1.98082	5.03148	1.87806	6.62957	5.7783	3.86874	5.92843	3.92612	7.58495	9.80999	2.31526	low
GSM363012	0.369863	1	7.94282	8.75923	3.55384	5.18522	2.573	7.68643	4.92327	4.76621	6.5559	4.93907	6.86146	7.3555	2.4771	low
GSM363014	4.98904	0	8.29223	8.7157	2.78489	5.04739	2.07662	7.48363	4.49174	5.28538	5.06668	4.62099	9.11162	8.75423	2.67812	low
GSM363015	4.90685	0	6.85822	3.58021	3.24208	4.63041	2.25148	8.17584	4.74436	4.73157	5.78113	4.71396	8.67706	8.60796	2.75042	low
GSM363016	0.164384	0	8.03075	7.96159	2.90098	6.18241	1.97396	7.97087	5.3207	4.03113	5.51722	4.03331	7.62957	7.59486	2.26265	low
GSM363031	4.33973	0	7.41779	7.53196	3.97949	4.88268	4.83165	6.81455	4.64973	4.84995	7.2864	4.7348	8.04048	7.80942	2.82033	low
GSM363034	3.7726	1	7.71329	6.34501	2.48916	5.73313	3.5934	8.08458	6.12699	4.09568	5.62749	5.78184	7.4602	8.01225	2.55647	low
GSM363035	4.61096	0	8.62998	7.8502	3.5407	7.03411	3.65578	8.16645	4.83681	4.72969	7.07493	3.76912	7.72643	7.69776	2.52935	low
GSM363036	2.68767	1	6.87686	7.93193	3.46718	6.04355	2.55221	7.32356	4.86526	5.64325	5.81813	3.23725	8.65803	6.99916	2.81152	low
GSM363039	4.33973	0	9.06848	8.87996	2.99079	4.90843	3.53843	7.82629	4.49058	5.34001	7.05312	4.15913	8.93497	8.25148	2.70201	low
GSM363049	5.12877	0	6.70224	7.73524	3.69443	4.92962	3.42554	7.8038	4.69952	5.41969	6.07441	4.77602	8.04827	7.74594	2.87509	low
GSM363050	4.45479	0	5.9597	8.50475	3.77643	5.14329	3.40577	6.36694	5.47588	4.61357	7.21744	5.58181	8.76348	7.84587	2.88684	low
GSM363053	4.68493	0	7.72313	6.37987	3.51903	5.03459	2.11591	8.31507	5.4292	5.13025	6.53793	4.90081	7.86983	8.72148	2.76768	low
GSM363073	2.17808	1	5.78388	6.83263	3.70939	3.94675	3.66209	5.51659	5.14072	4.92943	7.84388	5.2061	8.17495	7.14888	2.91911	low
GSM363074	4.74247	0	7.62759	8.82102	3.32609	5.73004	4.12124	7.1605	5.13603	4.80571	5.77908	4.41177	8.34943	8.93884	2.75328	low
GSM363075	1.47945	1	7.76502	7.95434	3.63844	5.81726	5.26335	7.86498	5.16612	5.12086	7.62135	4.73089	8.73031	7.12636	2.92314	low
GSM363076	1.89041	1	6.99105	4.96655	3.19415	3.26511	2.69468	8.26904	5.38849	4.45202	6.65479	4.19198	7.4602	6.64362	2.52557	low
GSM363087	4.43836	0	7.33633	9.29244	4.00154	5.69001	2.53616	7.87192	4.81271	4.28608	6.35564	5.02462	8.43695	7.83292	2.54254	low
GSM363098	4.67671	0	6.75931	8.30366	3.31907	5.54075	2.56592	6.22337	6.01822	2.78595	5.52235	5.4322	8.17495	6.22218	2.22033	low
GSM363099	2.53973	1	5.88675	6.40638	2.31919	5.27032	3.40885	6.42735	5.36566	3.58331	7.45086	4.60754	8.52415	8.30118	2.49255	low
GSM363101	4.6274	0	3.22485	1.98115	3.17279	4.77705	2.07132	7.15833	4.93285	4.74525	6.55443	5.24648	8.11693	7.07444	2.91771	low
GSM363104	2.95068	1	7.74803	8.87624	3.68541	5.23204	1.96565	7.6981	4.65738	4.75408	4.81957	4.11754	7.92202	5.79718	2.41369	low
GSM363108	4.01096	0	8.20766	8.37551	3.53332	5.42828	4.41492	7.91394	5.01414	4.71962	6.12856	4.78695	7.9688	6.92022	2.64194	low
GSM363115	5.47397	0	8.22996	6.80524	3.50307	5.11848	3.18455	7.99127	4.93627	4.85255	5.62552	4.77601	8.79833	8.1044	2.73155	low
GSM363121	4.20822	0	6.59412	5.76198	3.63428	5.14193	5.11817	6.64426	5.53499	3.99784	8.05744	5.09933	9.02092	7.68064	2.84656	low
GSM363122	4.55342	0	7.44899	6.07105	1.02179	6.21592	2.66288	6.9904	3.09125	3.90947	6.42798	5.17371	8.70846	7.19881	2.14967	low
GSM363124	4.39726	0	8.56667	8.22982	2.64887	5.52893	3.64965	7.78184	5.93269	4.7946	4.26823	5.00221	7.66713	6.42208	2.57025	low
GSM363125	1.35616	1	7.31984	8.77755	3.66756	4.93945	3.93468	6.89372	4.80199	5.0084	6.59122	4.79056	8.82061	7.537	2.82299	low
GSM363130	5.07945	0	7.78272	6.78633	3.34074	4.98699	2.97629	7.53901	4.86298	4.78079	8.11714	4.2808	8.12861	8.89146	2.66778	low
GSM363142	3.78904	1	7.09009	8.43071	4.16352	5.443	4.41196	7.23766	5.66921	3.3644	8.38044	5.49619	8.36681	8.1044	2.58391	low
GSM363143	2.67945	1	5.31261	6.81304	2.86028	5.28996	2.77868	6.3155	4.63197	2.75785	6.47036	5.06271	9.49517	7.89558	2.32733	low
GSM363148	4.30685	0	6.47603	9.48565	4.24766	4.9512	1.79102	7.41448	4.13834	5.00778	7.46112	4.75987	9.19162	8.44328	2.7637	low
GSM363149	1.18356	0	7.14735	9.41723	3.64996	4.98208	3.6015	7.72424	5.47322	5.25734	5.73494	4.0147	8.0761	7.32958	2.79537	low
GSM363151	5.51507	0	6.13147	8.33376	3.33635	4.82873	2.11411	6.69957	5.28797	5.41619	6.44698	4.57587	8.56436	8.28926	2.89843	low
GSM363152	0.682192	1	6.04138	7.12082	3.04082	5.1793	1.9543	7.47102	4.67336	5.28389	6.49333	4.53755	9.96215	6.17328	2.83342	low
GSM363164	4.53699	0	7.67456	8.65	3.18365	6.5752	1.76154	7.61299	5.40534	4.92182	6.44224	4.64352	9.49517	9.32982	2.76415	low
GSM363168	4.42192	0	9.37798	3.91765	2.92028	4.70739	1.816	8.06794	5.1299	4.60242	5.01012	4.4828	9.23309	7.97973	2.57106	low
GSM363174	5.51507	0	4.24844	8.31457	3.77801	5.38828	1.88101	6.59634	4.09445	5.14833	7.37458	5.53301	9.20605	6.27049	2.87659	low
GSM363176	4.16712	0	7.88005	8.8005	2.85024	5.40201	2.45456	8.41687	4.95107	4.94681	6.41539	4.45481	7.95634	7.05446	2.50602	low
GSM363178	4.70959	0	6.743	8.24676	3.14928	4.56963	1.60059	7.29666	5.29637	4.99549	6.44376	5.15009	8.16729	7.91344	2.68951	low
GSM363180	3.87123	1	7.2097	8.86676	4.25824	5.08562	1.82034	7.25487	4.82606	5.09591	5.46744	4.95237	8.24574	5.27546	2.63946	low
GSM363182	4.33151	0	6.82401	6.32944	3.42572	4.72346	2.02246	5.93919	4.77843	5.90683	6.60058	4.73206	7.38782	7.72445	2.89616	low
GSM363186	0.624658	1	8.75455	9.17164	2.62813	6.23883	2.62156	8.19169	4.37218	4.95976	6.42173	4.45943	7.74543	7.41516	2.39832	low
GSM363188	4.70959	0	8.09296	8.57474	3.27978	5.32031	2.84331	7.89232	5.21605	4.75377	6.17327	4.94439	7.83273	7.39713	2.56616	low
GSM363200	1.96438	1	7.81776	7.70439	2.35014	4.15268	3.90265	8.07618	5.86496	5.01625	5.27364	4.73206	7.94935	7.44644	2.70826	low
GSM363202	4.93151	0	3.21834	5.16189	3.06602	6.83167	2.10132	7.98419	4.65485	4.38785	7.49537	5.2033	8.41879	7.77372	2.76208	low
GSM363205	4.76712	0	6.46113	4.46765	3.7251	6.22695	2.02193	6.54307	4.57968	4.53622	6.27302	4.48481	8.56436	8.28078	2.70355	low
GSM363209	4.99726	0	7.13078	9.17164	3.27464	4.69228	2.4564	7.26161	4.88449	5.40242	5.40888	5.29401	9.08575	6.20357	2.79854	low
GSM363211	0.731507	1	5.44628	6.23995	3.62986	4.26091	2.62665	7.94939	4.57452	4.85102	5.74428	4.84366	8.84261	6.11855	2.76677	low
GSM363213	4.73425	0	6.72026	5.81715	3.18025	4.91361	2.64574	8.35609	4.65072	3.45478	4.83	4.62725	8.74203	8.48966	2.38061	low
GSM363215	1.52877	0	6.40188	4.43483	3.32609	4.20546	3.69901	7.77055	4.711	4.81	7.50646	5.3454	8.20661	7.93895	2.84955	low
GSM363220	4.45479	0	7.6839	7.54705	4.05114	4.95419	2.84008	8.26904	5.3748	5.08847	8.01003	4.60065	7.79515	7.55804	2.75844	low
GSM363224	4.7589	0	5.32792	6.92352	3.96928	4.58953	3.39907	8.54958	4.20913	5.46659	4.98732	4.3055	7.40844	9.20994	2.91683	low
GSM363226	4.96438	0	7.52269	9.30074	3.65713	5.79938	4.43924	7.71513	4.44614	5.14798	7.87148	4.46191	7.99119	7.83852	2.75603	low
GSM363230	0.394521	0	7.37118	7.32833	4.25948	5.48413	2.93299	6.2245	5.58273	5.08435	6.6442	4.59898	8.06877	8.39811	2.89588	low
GSM363232	4.7589	0	5.10454	6.71649	3.1202	4.19711	3.04529	7.17289	4.84821	4.74253	4.36837	5.03387	8.29598	7.23856	2.76596	low
GSM363241	4.45479	0	8.89068	7.38992	3.79249	5.02213	4.24749	7.67523	5.46581	4.49198	5.75829	4.6446	8.18613	8.49987	2.68986	low
GSM363243	4.5863	0	8.76247	9.05374	2.55557	5.8273	2.61081	7.73282	4.4413	4.79256	6.27156	4.12616	7.81466	6.77183	2.32866	low
GSM363265	5.35068	0	6.23898	5.69187	3.55848	5.28125	3.14304	7.91394	5.15749	4.82753	6.1495	5.06018	8.95877	6.86536	2.85791	low
GSM363266	0.205479	1	7.36284	7.76979	4.75662	5.52035	4.38532	6.32728	5.03383	4.70115	7.81573	5.21191	8.31397	8.38857	2.92372	low
GSM363267	3.93699	1	6.41838	9.14243	3.04867	4.96179	4.12185	7.13131	5.567	5.00607	7.10649	4.89118	8.16729	7.68607	2.84302	low
GSM363269	4.33151	1	7.91968	8.00827	3.51903	5.3767	1.93963	8.06794	4.83929	4.05633	7.50114	4.4123	8.00457	8.38857	2.36385	low
GSM363270	1.75068	1	7.30114	8.23485	3.2521	4.69065	2.66028	7.34634	4.11397	5.69071	6.40053	3.99161	7.94935	8.48038	2.75602	low
GSM363272	4.6274	0	7.64247	9.04222	2.94235	5.43579	6.33191	8.19169	4.60522	5.07202	7.01783	4.38021	8.29598	6.90765	2.78638	low
GSM363273	4.76712	0	8.23378	8.08022	2.81487	6.18024	4.355	8.71176	4.50091	4.84082	5.89011	4.30675	7.58495	6.98516	2.50688	low
GSM363275	4.91507	0	7.96513	9.56453	3.29703	7.08522	3.13881	7.83941	5.04248	4.60294	6.24944	4.24342	7.5406	6.49736	2.42553	low
GSM363288	4.95616	0	6.98176	7.96829	3.22618	5.93873	2.18324	8.05325	3.87287	5.04495	5.92368	4.68633	8.43695	7.43504	2.58459	low
GSM363289	4.45479	0	3.1828	3.57464	3.40297	5.50201	1.64776	6.59061	5.34104	4.52803	5.4383	4.856	8.06877	7.4675	2.85051	low
GSM363290	4.49589	0	7.40264	6.1017	4.09716	4.74272	2.46636	8.28795	3.93175	4.92015	6.12856	4.79526	8.14487	6.6895	2.61887	low
GSM363291	4.11781	1	7.56628	7.35241	3.67578	5.89295	4.26972	7.5145	4.62212	4.63296	7.21997	4.6746	8.33212	7.49203	2.69776	low
GSM363293	5.05479	0	7.54098	7.7506	3.06986	5.49833	5.32453	7.6927	4.75709	4.47605	7.69617	4.13988	8.01168	6.99916	2.60575	low
GSM363294	5.14521	0	6.30258	6.7108	2.87631	4.39466	2.7935	7.97087	4.85114	4.60347	6.34111	5.04373	8.65803	7.63181	2.67315	low
GSM363295	4.51233	0	8.11598	7.92505	3.52501	6.7986	4.57535	7.64671	6.07187	3.99424	6.56811	4.42773	8.21405	5.99159	2.54343	low
GSM363298	4.40548	0	5.79651	3.21895	3.31844	4.41479	2.29014	7.41925	4.72665	4.78459	7.3232	5.22597	9.17794	7.49926	2.87578	low
GSM363312	4.54521	0	7.50209	6.58043	3.67687	6.51994	2.82344	7.41925	5.10911	4.31606	6.08815	4.63792	7.56787	8.15057	2.54675	low
GSM363313	3.00822	0	7.00674	7.73858	3.15001	6.4362	1.92664	7.58532	4.22675	4.13322	8.32911	4.9021	8.78695	6.87193	2.39564	low
GSM363315	5.37534	0	6.39465	9.38317	3.57699	5.7422	1.60967	6.67033	4.7001	4.91148	7.20782	3.61375	9.74912	6.98344	2.67222	low
GSM363316	4.49589	0	7.38157	4.44212	3.33246	4.92824	2.01565	7.36565	5.10506	4.51942	4.79063	4.87208	8.77569	10.1283	2.75263	low
GSM363326	3.05753	1	6.65646	7.92954	3.78474	4.79375	3.1253	7.30559	4.55394	5.18175	7.22741	5.01664	9.13651	8.14283	2.91356	low
GSM363327	4.93973	0	7.81974	8.27154	3.62263	5.43006	4.83723	7.95592	5.8327	4.6128	5.38335	4.70679	8.21405	9.11535	2.83212	low
GSM363328	0.986301	1	6.47902	7.19997	4.71638	5.01926	4.37348	6.0633	4.94232	4.4095	7.2466	4.97769	9.05952	7.62097	2.9174	low
GSM363331	3	1	6.03924	8.47318	3.68619	5.73196	2.43617	7.23561	4.84599	5.54202	7.88579	4.41577	8.98402	6.31728	2.89441	low
GSM363335	4.88219	0	8.89068	9.39971	2.64398	6.76545	2.53038	8.20815	4.2869	4.89425	6.42173	4.25012	7.82114	5.96107	2.30051	low
GSM363336	0.657534	1	7.91452	7.49406	3.12842	5.08198	3.93565	7.67814	4.46467	4.32972	7.2225	4.52723	8.15888	6.47566	2.45982	low
GSM363343	5.35068	0	6.90084	5.70332	3.985	5.66921	2.09833	7.13131	3.95328	5.32861	6.52685	4.50577	8.48036	6.90942	2.76669	low
GSM363344	3.18082	0	7.21151	7.5291	4.40241	5.89172	5.0947	8.00591	5.15889	4.83326	6.32726	4.70784	7.85178	8.0893	2.89394	low
GSM363346	1.17534	1	8.1657	7.20696	5.17981	4.24651	1.85088	6.63522	5.16821	4.9838	7.01998	4.95176	7.86983	9.57914	2.84428	low
GSM363357	0.723288	1	5.10291	7.15857	3.89637	4.28985	2.79039	6.7523	4.03917	5.04558	7.28168	5.79652	8.91046	6.43797	2.88691	low
GSM363362	0.476712	1	7.05412	8.87624	3.28221	5.7022	2.79558	6.72234	4.14417	4.99677	7.18019	5.4138	8.62521	6.37102	2.65088	low
GSM363364	2.2274	1	9.62043	8.28422	2.75584	5.50601	1.9716	7.91394	4.17823	5.22569	5.65434	4.25269	7.84513	7.28026	2.39048	low
GSM363366	4.29863	0	8.37755	5.92315	2.90218	4.95419	1.90909	7.94259	4.51663	4.75765	5.66334	4.05282	7.05238	8.87955	2.40654	low
GSM363371	5.44932	0	8.40626	7.61125	3.32147	6.24357	4.02948	8.49729	4.26634	4.55259	8.05744	4.97769	8.53457	6.78074	2.54891	low
GSM363378	2.62192	1	7.47768	6.9885	3.49093	5.19482	2.31647	7.2922	4.13285	4.97109	6.565	4.04249	10.0667	8.15057	2.75279	low
GSM363391	4.70959	0	7.77878	8.3978	3.88775	4.79246	3.4963	8.23373	5.06535	4.65794	7.17785	5.14459	7.93565	7.02257	2.64177	low
GSM363404	0.986301	1	4.50184	6.04512	3.50654	5.1782	2.11852	7.92144	5.12433	4.44131	5.07376	4.26385	8.76348	4.79109	2.63397	low
