# Supplementary material for: A novel fatty acid metabolism-related gene prognostic signature and candidate drugs for patients with hepatocellular carcinoma
Source: PeerJ. 2023 Jan 6;11:e14622. doi: 10.7717/peerj.14622 (PMC9828273; doi:10.7717/peerj.14622)
Supplement: Supplemental Information 3 [file peerj-11-14622-s003.xlsx]

## Sheet: PON1
	GAPDH	Mean value	PON1	Mean value	PON1-GAPDH	Mean value (PON1-GAPDH in MIHA)	Δ Ct	2 -ΔΔ Ct	MIHA	MHCC97H	Huh-7
MIHA 1	16.46	16.43	30.5	30.615	14.185	14.29	-0.105	1.07549	1.07549	0.142102	0.342696
	16.4		30.73
MIHA 2	15.76	15.835	30.34	30.25	14.415		0.125	0.917004	0.917004	0.072293	0.252613
	15.91		30.16
MIHA 3	16.23	16.24	30.55	30.51	14.27		-0.02	1.01396	1.01396	0.231647	0.320856
	16.25		30.47
MHCC97H 1	16.33	16.41	33.34	33.515	17.105		2.815	0.142102	Tests of Normality
	16.49		33.69							Shapiro-Wilk
MHCC97H 2	17.68	17.61	35.69	35.69	18.08		3.79	0.072293		Sta.	df	Sig.
	17.54		35.69						MIHA	0.983624	3	0.754924
MHCC97H 3	16.33	16.395	32.84	32.795	16.4		2.11	0.231647	MHCC97H	0.994913	3	0.863669
	16.46		32.75						Huh7	0.918735	3	0.447899
Huh7 1	15.17	15.12	30.84	30.955	15.835		1.545	0.342696
	15.07		31.07
Huh7 2	15.88	15.775	31.98	32.05	16.275		1.985	0.252613	Indepentent Samples Test
	15.67		32.12								Levene's Test for Equality of Variances		t-test for Equality of Means
Huh7 3	14.88	14.85	30.7	30.78	15.93		1.64	0.320856			F	Sig.	t	df	Sig.（2-tailed）	Mean Difference	Std.Error Difference	95% Confidence Interval of the Difference
	14.82		30.86															lower	Upper
									MIHA and MHCC97H	Equal variances assumed	0.00189973	0.967323	13.0839	4	0.000197007	0.853472	0.0652309	0.672362	1.03458
										Equal variances not assumed			13.0839	4	0.000197007	0.853472	0.0652309	0.672362	1.03458
									Indepentent Samples Test
											Levene's Test for Equality of Variances		t-test for Equality of Means
											F	Sig.	t	df	Sig.（2-tailed）	Mean Difference	Std.Error Difference	95% Confidence Interval of the Difference
																		lower	Upper
									MIHA and Huh 7	Equal variances assumed	0.734628	0.439703	13.0193	4	0.000200869	0.696764	0.0535179	0.548175	0.845354
										Equal variances not assumed			13.0193	3.23567	0.000663337	0.696764	0.0535179	0.533254	0.860275

## Sheet: CYP2C9
	GAPDH	Mean value	CYP2C9	Mean value	CYP2C9-GAPDH	Mean value (ACACA-GAPDH in MIHA)	Δ Ct	2 -ΔΔ Ct	MIHA	MHCC97H	Huh-7
MIHA 1	16.46	16.28	28.48	28.535	12.255	12.015	0.24	0.846745	0.846745	0.000528796	0.000578659
	16.1		28.59
MIHA 2	15.76	15.835	27.83	27.81	11.975		-0.04	1.02811	1.02811	0.000753033	0.00273357
	15.91		27.79
MIHA 3	16.23	16.24	28.02	28.055	11.815		-0.2	1.1487	1.1487	0.00358205	0.00319493
	16.25		28.09
MHCC97H 1	16.33	16.41	39.31	39.31	22.9		10.885	0.000528796
	16.49		39.31						Tests of Normality
MHCC97H 2	17.68	17.61	40	40	22.39		10.375	0.000753033		Shapiro-Wilk
	17.54		40							Sta.	df	Sig.
MHCC97H 3	16.33	16.395	36.64	36.535	20.14		8.125	0.00358205	MIHA	0.986672	3	0.779023
	16.46		36.43						MHCC97H	0.804763	3	0.12592
Huh7 1	15.17	15.12	37.89	37.89	22.77		10.755	0.000578659	Huh7	0.877446	3	0.316933
	15.07		37.89
Huh7 2	15.88	15.775	36.18	36.305	20.53		8.515	0.00273357
	15.67		36.43						Indepentent Samples Test
Huh7 3	14.88	14.85	35.26	35.155	20.305		8.29	0.00319493			Levene's Test for Equality of Variances		t-test for Equality of Means
	14.82		35.05								F	Sig.	t	df	Sig.（2-tailed）	Mean Difference	Std.Error Difference	95% Confidence Interval of the Difference
																		lower	Upper
									MIHA and MHCC97H	Equal variances assumed	5.82402	0.0732924	11.4659	4	0.000330224	1.00623	0.0877585	0.762575	1.24989
										Equal variances not assumed			11.4659	2.0005	0.00751398	1.00623	0.0877585	0.628728	1.38373
									Indepentent Samples Test
											Levene's Test for Equality of Variances		t-test for Equality of Means
											F	Sig.	t	df	Sig.（2-tailed）	Mean Difference	Std.Error Difference	95% Confidence Interval of the Difference
																		lower	Upper
									MIHA and Huh 7	Equal variances assumed	5.85123	0.0728472	11.4599	4	0.0003309	1.00568	0.0877567	0.762032	1.24933
										Equal variances not assumed			11.4599	2.00034	0.00752399	1.00568	0.0877567	0.628158	1.38321

## Sheet: ACACA
	GAPDH	Mean value	ACACA	Mean value	ACACA-GAPDH	Mean value (ACACA-GAPDH in MIHA)	Δ Ct	2 -ΔΔ Ct	MIHA	MHCC97H	Huh
MIHA 1	16.46	16.28	23.78	23.96	7.68	7.58333	0.1	0.933033	0.933033	2.21914	1.61328
	16.1		24.14
MIHA 2	15.76	15.835	23.5	23.535	7.7		0.12	0.920188	0.920188	2.03496	1.40444
	15.91		23.57
MIHA 3	16.23	16.24	23.63	23.61	7.37		-0.21	1.15669	1.15669	2.32141	0.747425
	16.25		23.59
MHCC97H 1	16.33	16.41	22.76	22.84	6.43		-1.15	2.21914	Tests of Normality
	16.49		22.92							Shapiro-Wilk
MHCC97H 2	17.68	17.61	24.28	24.165	6.555		-1.025	2.03496		Sta.	df	Sig.
	17.54		24.05						MIHA	0.790609	3	0.0922709
MHCC97H 3	16.33	16.395	22.74	22.76	6.365		-1.215	2.32141	MHCC97H	0.973467	3	0.687511
	16.46		22.78						Huh7	0.918014	3	0.445383
Huh7 1	15.17	15.12	22.02	22.01	6.89		-0.69	1.61328
	15.07		22
Huh7 2	14.98	14.925	22.02	22.015	7.09		-0.49	1.40444
	14.87		22.01						Indepentent Samples Test
Huh7 3	14.88	14.85	22.94	22.85	8		0.42	0.747425			Levene's Test for Equality of Variances		t-test for Equality of Means
	14.82		22.76								F	Sig.	t	df	Sig.（2-tailed）	Mean Difference	Std.Error Difference	95% Confidence Interval of the Difference
																		lower	Upper
									MIHA and MHCC97H	Equal variances assumed	0.00243747	0.962991	-10.4565	4	0.000472694	-1.18853	0.113665	-1.50412	-0.872949
										Equal variances not assumed			-10.4565	3.96971	0.000491647	-1.18853	0.113665	-1.50507	-0.871997
									Indepentent Samples Test
											Levene's Test for Equality of Variances		t-test for Equality of Means
											F	Sig.	t	df	Sig.（2-tailed）	Mean Difference	Std.Error Difference	95% Confidence Interval of the Difference
																		lower	Upper
									MIHA and Huh 7	Equal variances assumed	4.86681	0.0920265	-0.925751	4	0.406972	-0.251748	0.27194	-1.00677	0.503277
										Equal variances not assumed			-0.925751	2.34393	0.439715	-0.251748	0.27194	-1.27175	0.768253

## Sheet: ACADS
	GAPDH	Mean value	ACADS	Mean value	ACADS-GAPDH	Mean value (ACADS-GAPDH in MIHA)	Δ Ct	2 -ΔΔ Ct		MIHA	MHCC97H	Huh7
MIHA 1	15.56	15.515	24.81	24.7133	9.19833	9.40056	-0.201667	1.15003		1.15003	0.351517	0.363493
	15.47		24.8
			24.53
MIHA 2	15.32	15.42	24.97	25.14	9.72		0.32	0.80107		0.80107	0.540862	0.228458
	15.52		25.27
			25.18
MICA 3	16.29	16.25	25.73	25.5333	9.28333		-0.116667	1.08423		1.08423	0.302848	0.3423
	16.21		25.43
			25.44
MHCC97H 1	15.09	15.145	25.96	26.0533	10.9083		1.50833	0.351517		Tests of Normality
	15.2		26.07								Shapiro-Wilk
			26.13								Sta	df	Sig.
MHCC97H 2	17.31	17.3	27.7	27.5867	10.2867		0.886667	0.540862		MIHA	0.885484	3	0.340681
	17.29		27.59							MHCC97H	0.895701	3	0.371946
			27.47							Huh7	0.864367	3	0.279673
MHCC97H 3	15.04	15.05	26.28	26.1733	11.1233		1.72333	0.302848
	15.06		26.06
			26.18							Indepentent Samples Test
Huh7 1	14.98	14.93	25.77	25.79	10.86		1.46	0.363493				Levene's Test for Equality of Variances		t-test for Equality of Means
	14.88		25.91									F	Sig.	t	df	Sig.（2-tailed）	Mean Difference	Std.Error Difference	95% Confidence Interval of the Difference
			25.69																lower	Upper
Huh7 2	14.95	14.96	26.51	26.49	11.53		2.13	0.228458		MIHA and MHCC97H	Equal variances assumed	0.879082	0.401536	4.74203	4	0.00902366	0.613365	0.129346	0.254242	0.972488
	14.97		26.5								Equal variances not assumed			4.74203	3.51848	0.0122978	0.613365	0.129346	0.234003	0.992727
			26.46
Huh7 3	14.91	14.83	25.71	25.7767	10.9467		1.54667	0.3423
	14.75		25.89							Indepentent Samples Test
			25.73									Levene's Test for Equality of Variances		t-test for Equality of Means
												F	Sig.	t	df	Sig.（2-tailed）	Mean Difference	Std.Error Difference	95% Confidence Interval of the Difference
																			lower	Upper
										MIHA and Huh 7	Equal variances assumed	3.97933	0.116805	6.09171	4	0.00367232	0.700357	0.114969	0.381152	1.01956
											Equal variances not assumed			6.09171	2.5995	0.013273	0.700357	0.114969	0.300423	1.10029

## Sheet: ME1
	GAPDH	Mean value	ME1	Mean value	ME1-GAPDH	Mean value (ME1-GAPDH in MIHA)	Δ Ct	2 -ΔΔ Ct	MIHA	MHCC97H	Huh
MIHA 1	16.25	16.145	25.75	25.775	9.63	9.70833	-0.07	1.04972	1.04972	2.95878	1.68763
	16.04		25.8
MIHA 2	15.74	15.745	25.92	25.905	10.16		0.46	0.726986	0.726986	4.89056	1.45902
	15.75		25.89
MIHA 3	16.04	16.085	25.81	25.42	9.335		-0.365	1.28788	1.28788	4.01389	1.87254
	16.13		25.03
MHCC97H 1	16.49	16.47	24.59	24.605	8.135		-1.565	2.95878
	16.45		24.62						Tests of Normality
MHCC97H 2	17.18	17.38	24.95	24.79	7.41		-2.29	4.89056		Shapiro-Wilk
	17.58		24.63							Sta.	df	Sig.
MHCC97H 3	16.15	16.17	23.91	23.865	7.695		-2.005	4.01389	MIHA	0.99248	3	0.834172
	16.19		23.82						MHCC97H	0.997164	3	0.898245
Huh7 1	15.05	14.91	23.94	23.855	8.945		-0.755	1.68763	Huh7	0.996292	3	0.883623
	14.77		23.77
Huh7 2	15.61	15.59	24.58	24.745	9.155		-0.545	1.45902
	15.57		24.91
Huh7 3	14.85	14.84	23.44	23.635	8.795		-0.905	1.87254
	14.83		23.83						Indepentent Samples Test
											Levene's Test for Equality of Variances		t-test for Equality of Means
											F	Sig.	t	df	Sig.（2-tailed）	Mean Difference	Std.Error Difference	95% Confidence Interval of the Difference
																		lower	Upper
									MIHA and MHCC97H	Equal variances assumed	2.21292	0.211073	-5.04259	4	0.0072688	-2.93288	0.581621	-4.54772	-1.31804
										Equal variances not assumed			-5.04259	2.33639	0.0267199	-2.93288	0.581621	-5.11993	-0.745828
									Indepentent Samples Test
											Levene's Test for Equality of Variances		t-test for Equality of Means
											F	Sig.	t	df	Sig.（2-tailed）	Mean Difference	Std.Error Difference	95% Confidence Interval of the Difference
																		lower	Upper
									MIHA and Huh 7	Equal variances assumed	0.25579	0.639626	-3.2288	4	0.0320119	-0.651537	0.201789	-1.21179	-0.0912809
										Equal variances not assumed			-3.2288	3.67483	0.0361548	-0.651537	0.201789	-1.2319	-0.0711777

## Sheet: ACAT1
	GAPDH	Mean value	ACAT1	Mean value	ACAT1-GAPDH	Mean value (ACAT1-GAPDH in MIHA)	Δ Ct	2 -ΔΔ Ct	MIHA	MHCC97H	Huh-7
MIHA 1	16.25	16.145	21.26	21.27	5.125	5.225	-0.1	1.07177	1.07177	0.657471	0.488016
	16.04		21.28				-5.225
MIHA 2	15.74	15.745	21	21.04	5.295		0.07	0.952638	0.952638	0.628507	0.407536
	15.75		21.08				-5.225
MIHA 3	16.04	16.085	21.43	21.34	5.255		0.03	0.97942	0.97942	0.562529	0.423373
	16.13		21.25				-5.225
MHCC97H 1	16.49	16.47	22.29	22.3	5.83		0.605	0.657471	Tests of Normality
	16.45		22.31				-5.225			Shapiro-Wilk
MHCC97H 2	17.18	17.38	23.12	23.275	5.895		0.67	0.628507		Sta.	df	Sig.
	17.58		23.43				-5.225		MIHA	0.908285	3	0.412383
MHCC97H 3	16.15	16.17	22.27	22.225	6.055		0.83	0.562529	MHCC97H	0.951783	3	0.57718
	16.19		22.18				-5.225		Huh7	0.890795	3	0.356773
Huh7 1	15.05	14.91	20.9	21.17	6.26		1.035	0.488016
	14.77		21.44				-5.225
Huh7 2	15.61	15.59	21.99	22.11	6.52		1.295	0.407536	Indepentent Samples Test
	15.57		22.23				-5.225				Levene's Test for Equality of Variances		t-test for Equality of Means
Huh7 3	14.85	14.84	21.32	21.305	6.465		1.24	0.423373			F	Sig.	t	df	Sig.（2-tailed）	Mean Difference	Std.Error Difference	95% Confidence Interval of the Difference
	14.83		21.29															lower	Upper
									MIHA and MHCC97H	Equal variances assumed	0.363228	0.57922	8.42098	4	0.00108877	0.385108	0.045732	0.258136	0.51208
										Equal variances not assumed			8.42098	3.77302	0.00140119	0.385108	0.045732	0.255066	0.51515
									Indepentent Samples Test
											Levene's Test for Equality of Variances		t-test for Equality of Means
											F	Sig.	t	df	Sig.（2-tailed）	Mean Difference	Std.Error Difference	95% Confidence Interval of the Difference
																		lower	Upper
									MIHA and Huh 7	Equal variances assumed	0.766579	0.430705	12.8574	4	0.000210972	0.561635	0.0436819	0.440355	0.682916
										Equal variances not assumed			12.8574	3.52997	0.000432447	0.561635	0.0436819	0.433713	0.689558

## Sheet: ELOVL1
	GAPDH	Mean value	ELOV1	Mean value	ELOV1-GAPDH	Mean value (ELOVL1-GAPDH in MIHA)	Δ Ct	2 -ΔΔ Ct	MIHA	MHCC97H	Huh7
MIHA 1	16.25	16.145	24.31	24.155	8.01	7.955	0.055	0.962594	0.962594	1.82134	1.19748
	16.04		24
MIHA 2	15.74	15.745	23.91	23.83	8.085		0.13	0.913831	0.913831	1.6529	1.39959
	15.75		23.75
MIHA 3	16.04	16.085	23.77	23.855	7.77		-0.185	1.13682	1.13682	1.54221	1.05336
	16.13		23.94
MHCC97H 1	16.49	16.47	23.6	23.56	7.09		-0.865	1.82134
	16.45		23.52						Tests of Normality
MHCC97H 2	17.18	17.38	24.52	24.61	7.23		-0.725	1.6529		Shapiro-Wilk
	17.58		24.7							Sta.	df	Sig.
MHCC97H 3	16.15	16.17	23.47	23.5	7.33		-0.625	1.54221	MIHA	0.904552	3	0.400141
	16.19		23.53						MHCC97H	0.985933	3	0.772947
Huh7 1	15.05	14.91	22.67	22.605	7.695		-0.26	1.19748	Huh7	0.990736	3	0.815889
	14.77		22.54
Huh7 2	15.61	15.59	23.04	23.06	7.47		-0.485	1.39959
	15.57		23.08						Indepentent Samples Test
Huh7 3	14.85	14.84	22.73	22.72	7.88		-0.075	1.05336			Levene's Test for Equality of Variances		t-test for Equality of Means
	14.83		22.71								F	Sig.	t	df	Sig.（2-tailed）	Mean Difference	Std.Error Difference	95% Confidence Interval of the Difference
																		lower	Upper
									MIHA and MHCC97H	Equal variances assumed	0.0538809	0.827835	-6.31907	4	0.00320847	-0.667736	0.10567	-0.961123	-0.374349
										Equal variances not assumed			-6.31907	3.87511	0.00356847	-0.667736	0.10567	-0.96489	-0.370582
									Indepentent Samples Test
											Levene's Test for Equality of Variances		t-test for Equality of Means
											F	Sig.	t	df	Sig.（2-tailed）	Mean Difference	Std.Error Difference	95% Confidence Interval of the Difference
																		lower	Upper
									MIHA and Huh 7	Equal variances assumed	0.337275	0.592555	-1.75398	4	0.154298	-0.212394	0.121093	-0.548602	0.123813
										Equal variances not assumed			-1.75398	3.50636	0.164304	-0.212394	0.121093	-0.568118	0.143329

## Sheet: SMS
	GAPDH	Mean value	SMS	Mean value	SMS-GAPDH	Mean value (SMS-GAPDH in MIHA)	Δ Ct	2 -ΔΔ Ct	MIHA	MHCC97H	Huh7
MIHA 1	14.43	14.535	20.65	20.785	6.25	5.83	0.42	0.747425	0.747425	4.21344	2.63902
	14.64		20.92
MIHA 2	15.43	15.485	21.05	21.19	5.705		-0.125	1.09051	1.09051	4.56305	2.18859
	15.54		21.33
MIHA 3	15.54	15.55	21	21.085	5.535		-0.295	1.22688	1.22688	3.14923	2.33755
	15.56		21.17
MHCC97H 1	16.04	15.98	19.81	19.735	3.755		-2.075	4.21344
	15.92		19.66							Tests of Normality
MHCC97H 2	16.79	16.9	20.21	20.54	3.64		-2.19	4.56305			Shapiro-Wilk
	17.01		20.87								Sta.	df	Sig.
MHCC97H 3	15.7	15.58	19.82	19.755	4.175		-1.655	3.14923		MIHA	0.941659	3	0.534087
	15.46		19.69							MHCC97H	0.921526	3	0.457732
Huh7 1	14.52	14.585	19.18	19.015	4.43		-1.4	2.63902		Huh7	0.963199	3	0.631337
	14.65		18.85
Huh7 2	15.65	15.215	19.81	19.915	4.7		-1.13	2.18859	Indepentent Samples Test
	14.78		20.02								Levene's Test for Equality of Variances		t-test for Equality of Means
Huh7 3	14.81	14.855	19.45	19.46	4.605		-1.225	2.33755			F	Sig.	t	df	Sig.（2-tailed）	Mean Difference	Std.Error Difference	95% Confidence Interval of the Difference
	14.9		19.47															lower	Upper
									MIHA and MHCC97H	Equal variances assumed	4.12922	0.111952	-6.58639	4	0.0027517	-2.95364	0.448445	-4.19872	-1.70855
										Equal variances not assumed			-6.58639	2.44455	0.0130362	-2.95364	0.448445	-4.58299	-1.32428
									Indepentent Samples Test
											Levene's Test for Equality of Variances		t-test for Equality of Means
											F	Sig.	t	df	Sig.（2-tailed）	Mean Difference	Std.Error Difference	95% Confidence Interval of the Difference
																		lower	Upper
									MIHA and Huh 7	Equal variances assumed	0.0340853	0.862508	-7.02097	4	0.00216769	-1.36678	0.194671	-1.90727	-0.826286
										Equal variances not assumed			-7.02097	3.97843	0.00221187	-1.36678	0.194671	-1.90843	-0.825128

## Sheet: UGDH
	GAPDH	Mean value	UGDH	Mean value	UGDH-GAPDH	Mean value (UGDH-GAPDH in MIHA)	Δ Ct	2 -ΔΔ Ct	MIHA	MHCC97H	Huh7
MIHA 1	14.43	14.535	20.63	20.555	6.02	5.95167	0.07	0.952638	0.952638	1.22688	1.52098
	14.64		20.48
MIHA 2	15.43	15.485	21.33	21.375	5.89		-0.06	1.04247	1.04247	0.920188	1.85961
	15.54		21.42
MIHA 3	15.54	15.55	21.35	21.495	5.945		-0.005	1.00347	1.00347	1.39474	2.05623
	15.56		21.64
MHCC97H 1	16.04	15.98	21.76	21.635	5.655		-0.295	1.22688	Tests of Normality
	15.92		21.51							Shapiro-Wilk
MHCC97H 2	16.79	16.9	23.46	22.97	6.07		0.12	0.920188		Sta.	df	Sig.
	17.01		22.48						MIHA	0.994242	3	0.854944
MHCC97H 3	15.7	15.58	20.76	21.05	5.47		-0.48	1.39474	MHCC97H	0.97226	3	0.680417
	15.46		21.34						Huh7	0.977073	3	0.709697
Huh7 1	14.52	14.585	19.85	19.93	5.345		-0.605	1.52098
	14.65		20.01						Indepentent Samples Test
Huh7 2	15.65	15.215	20.3	20.27	5.055		-0.895	1.85961			Levene's Test for Equality of Variances		t-test for Equality of Means
	14.78		20.24								F	Sig.	t	df	Sig.（2-tailed）	Mean Difference	Std.Error Difference	95% Confidence Interval of the Difference
Huh7 3	14.81	14.855	19.76	19.765	4.91		-1.04	2.05623										lower	Upper
	14.9		19.77						MIHA and MHCC97H	Equal variances assumed	4.58512	0.0989444	-1.28111	4	0.269385	-0.18108	0.141346	-0.57352	0.211359
										Equal variances not assumed			-1.28111	2.13998	0.321416	-0.18108	0.141346	-0.752668	0.390508
									Indepentent Samples Test
											Levene's Test for Equality of Variances		t-test for Equality of Means
											F	Sig.	t	df	Sig.（2-tailed）	Mean Difference	Std.Error Difference	95% Confidence Interval of the Difference
																		lower	Upper
									MIHA and Huh 7	Equal variances assumed	4.60408	0.0984542	-5.12891	4	0.00684369	-0.812747	0.158464	-1.25271	-0.372781
										Equal variances not assumed			-5.12891	2.11063	0.0321207	-0.812747	0.158464	-1.46143	-0.164059

## Sheet: ADSL
	GAPDH	Mean value	ADSL	Mean value	ADSL-GAPDH	Mean value (ADSL-GAPDH in MIHA)	Δ Ct	2 -ΔΔ Ct	MIHA	MHCC97H	Huh7
MIHA 1	15.02	15.04	20.9	20.9	5.86	5.69333	0.17	0.888843	0.888843	2.90795	0.913831
	15.06		20.9
MIHA 2	15.54	15.61	21.21	21.2	5.59		-0.1	1.07177	1.07177	3.18215	1.20999
	15.68		21.19
MIHA 3	16.08	15.795	21.39	21.425	5.63		-0.06	1.04247	1.04247	2.21914	1.16473
	15.51		21.46
MHCC97H 1	15.97	16.045	20.16	20.195	4.15		-1.54	2.90795
	16.12		20.23						Tests of Normality
MHCC97H 2	16.91	16.94	20.76	20.96	4.02		-1.67	3.18215		Shapiro-Wilk
	16.97		21.16							Sta.	df	Sig.
MHCC97H 3	15.87	15.89	20.31	20.43	4.54		-1.15	2.21914	MIHA	0.866595	3	0.285909
	15.91		20.55						MHCC97H	0.941809	3	0.534701
Huh7 1	14.67	14.675	20.63	20.495	5.82		0.13	0.913831	Huh	0.861542	3	0.271829
	14.68		20.36
Huh7 2	15.46	15.035	20.17	20.45	5.415		-0.275	1.20999	Indepentent Samples Test
	14.61		20.73								Levene's Test for Equality of Variances		t-test for Equality of Means
Huh7 3	14.93	14.895	20.36	20.365	5.47		-0.22	1.16473			F	Sig.	t	df	Sig.（2-tailed）	Mean Difference	Std.Error Difference	95% Confidence Interval of the Difference
	14.86		20.37															lower	Upper
									MIHA and MHCC97H	Equal variances assumed	5.65448	0.0761619	-6.05687	4	0.0037505	-1.76872	0.292018	-2.57949	-0.957943
										Equal variances not assumed			-6.05687	2.15662	0.0218143	-1.76872	0.292018	-2.94165	-0.595779
									Indepentent Samples Test
											Levene's Test for Equality of Variances		t-test for Equality of Means
											F	Sig.	t	df	Sig.（2-tailed）	Mean Difference	Std.Error Difference	95% Confidence Interval of the Difference
																		lower	Upper
									MIHA and Huh 7	Equal variances assumed	1.44392	0.295784	-0.879672	4	0.428712	-0.0951591	0.108176	-0.395503	0.205185
										Equal variances not assumed			-0.879672	3.32635	0.43797	-0.0951591	0.108176	-0.421081	0.230763

[truncated: 2 more sheets: HSP90AA1, S100A10]
