# Supplementary material for: A novel fatty acid metabolism-related gene prognostic signature and candidate drugs for patients with hepatocellular carcinoma
Source: PeerJ. 2023 Jan 6;11:e14622. doi: 10.7717/peerj.14622 (PMC9828273; doi:10.7717/peerj.14622)
Supplement: Supplemental Information 4 [file peerj-11-14622-s004.xlsx]

## Sheet: PON1
	PON1	GAPDH	PON1/GAPDH		MIHA	MHCC97H	Huh7
MIHA 1	42824.9	45650.3	0.938108		0.938108	0.346253	0.538691		Tests of Normality
MHCC97H 1	16373.1	47286.5	0.346253		0.800709	0.708585	0.348514			Shapiro-Wilk
Huh-7 1	29501.7	54765.5	0.538691		1.08637	0.589814	0.530628			Sta.	df	Sig.
MIHA 2	47346.5	59130.7	0.800709						MIHA	0.999519	3	0.958094
MHCC97H 2	31976.4	45127.1	0.708585						MHCC97H	0.961965	3	0.625127
Huh-7 2	14863.7	42648.8	0.348514						Huh7	0.781736	3	0.0716045
MIHA 3	47803.8	44003.5	1.08636
MHCC97H 3	26447.7	44840.7	0.589814
Huh-7 3	26380.7	49716	0.530628						Indepentent Samples Test
											Levene's Test for Equality of Variances		Levene's Test for Equality of Variances
											F	Sig.	t	df	Sig.（2-tailed）	Mean Difference	Std.Error Difference	95% Confidence Interval of the Difference
																		lower	Upper
									MIHA and MHCC97H	Equal variances assumed	0.327273	0.597885	2.9188	4	0.0432954	0.39351	0.134819	0.0191919	0.767827
										Equal variances not assumed			2.9188	3.7622	0.046661	0.39351	0.134819	0.00967373	0.777345
									Indepentent Samples Test
											Levene's Test for Equality of Variances		Levene's Test for Equality of Variances
											F	Sig.	t	df	Sig.（2-tailed）	Mean Difference	Std.Error Difference	95% Confidence Interval of the Difference
																		lower	Upper
									MIHA and Huh 7	Equal variances assumed	0.072472	0.801087	4.5439	4	0.010466	0.469116	0.103241	0.182474	0.755759
										Equal variances not assumed			4.5439	3.71579	0.012407	0.469116	0.103241	0.173617	0.764616

## Sheet: CYP2C9
	CYP2C9	GAPDH	CYP2C9/GAPDH		MIHA	MHCC97H	Huh-7
MIHA 1	48229.3	51648.8	0.933793		0.933793	0.375237	0.357072
MHCC97H 1	15719	41890.9	0.375237		1.0174	0.690524	0.512026	Tests of Normality
Huh-7 1	15154.1	42439.9	0.357072		0.787991	0.432721	0.342472		Shapiro-Wilk
MIHA 2	50194.4	49336.2	1.0174						Sta.	df	Sig.
MHCC97H 2	35618.2	51581.4	0.690524					MIHA	0.976081	3	0.703436
Huh-7 2	25488.9	49780.5	0.512026					MHCC97H	0.8814	3	0.328526
MIHA 3	47100.5	59772.9	0.787991					Huh7	0.814058	3	0.148521
MHCC97H 3	17177.8	39697.1	0.432721
Huh-7 3	10799.2	31533.2	0.342472					Indepentent Samples Test
										Levene's Test for Equality of Variances		Levene's Test for Equality of Variances
										F	Sig.	t	df	Sig.（2-tailed）	Mean Difference	Std.Error Difference	95% Confidence Interval of the Difference
																	lower	Upper
								MIHA and MHCC97H	Equal variances assumed	0.838565	0.411619	3.50889	4	0.0246966	0.413566	0.117862	0.0863279	0.740803
									Equal variances not assumed			3.50889	3.5565	0.0298915	0.413566	0.117862	0.0695889	0.757542
								Indepentent Samples Test
										Levene's Test for Equality of Variances		Levene's Test for Equality of Variances
										F	Sig.	t	df	Sig.（2-tailed）	Mean Difference	Std.Error Difference	95% Confidence Interval of the Difference
																	lower	Upper
								MIHA and Huh 7	Equal variances assumed	0.0933521	0.775198	5.90506	4	0.00411595	0.509203	0.0862316	0.269786	0.748621
									Equal variances not assumed			5.90506	3.83341	0.00470067	0.509203	0.0862316	0.265626	0.75278

## Sheet: ACACA
	ACACA	GAPDH	ACACA/GAPDH		MIHA	MHCC97H	Huh-7
MIHA 1	13006.1	58782	0.22126		0.22126	0.74721	0.591024		Tests of Normality
MHCC97H 1	35687.1	47760.5	0.74721		0.56333	1.0015	0.537409			Shapiro-Wilk
Huh-7 1	29520.1	49947.4	0.591024		0.374134	0.81459	0.551644			Sta.	df	Sig.
MIHA 2	24723.9	43888.8	0.56333						MIHA	0.996256	3	0.883065
MHCC97H 2	44831.2	44764	1.0015						MHCC97H	0.931402	3	0.493881
Huh-7 2	26313.4	48963.5	0.537409						Huh7	0.931695	3	0.494989
MIHA 3	18577	49653.4	0.374134
MHCC97H 3	42461.6	52126.4	0.81459
Huh-7 3	30988	56174	0.551644						Indepentent Samples Test
											Levene's Test for Equality of Variances		Levene's Test for Equality of Variances
											F	Sig.	t	df	Sig.（2-tailed）	Mean Difference	Std.Error Difference	95% Confidence Interval of the Difference
																		lower	Upper
									MIHA and MHCC97H	Equal variances assumed	0.10548	0.761626	-3.75176	4	0.0199166	-0.468192	0.124792	-0.814671	-0.121712
										Equal variances not assumed			-3.75176	3.75219	0.0223374	-0.468192	0.124792	-0.823885	-0.112498
									Indepentent Samples Test
											Levene's Test for Equality of Variances		Levene's Test for Equality of Variances
											F	Sig.	t	df	Sig.（2-tailed）	Mean Difference	Std.Error Difference	95% Confidence Interval of the Difference
																		lower	Upper
									MIHA and Huh 7	Equal variances assumed	3.314	0.142804	-1.73396	4	0.157949	-0.173784	0.100224	-0.45205	0.104481
										Equal variances not assumed			-1.73396	2.105	0.218781	-0.173784	0.100224	-0.58504	0.237472

## Sheet: ACADS
	ACADS	GAPDH	ACADS/GAPDH		MIHA	MHCC97H	Huh-7
MIHA 1	58292.5	61270.3	0.951398		0.951398	0.695624	0.617681		Tests of Normality
MHCC97H 1	37373.5	53726.6	0.695624		0.958403	0.376869	0.398377			Shapiro-Wilk
Huh-7 1	37338.9	60450.1	0.617681		0.870047	0.361781	0.328546			Sta.	df	Sig.
MIHA 2	50442.9	52632.2	0.958403						MIHA	0.80906	3	0.136317
MHCC97H 2	17849.8	47363.4	0.376869						MHCC97H	0.783824	3	0.0764407
Huh-7 2	16403.2	41175.1	0.398377						Huh7	0.918202	3	0.446037
MIHA 3	50442.9	57977.2	0.870047
MHCC97H 3	17849.8	49338.7	0.361781
Huh-7 3	16403.2	49926.6	0.328546						Indepentent Samples Test
											Levene's Test for Equality of Variances		Levene's Test for Equality of Variances
											F	Sig.	t	df	Sig.（2-tailed）	Mean Difference	Std.Error Difference	95% Confidence Interval of the Difference
																		lower	Upper
									MIHA and MHCC97H	Equal variances assumed	8.07285	0.0468071	3.98737	4	0.0163006	0.448525	0.112486	0.136213	0.760836
										Equal variances not assumed			3.98737	2.27021	0.0464761	0.448525	0.112486	0.0157559	0.881293
									Indepentent Samples Test
											Levene's Test for Equality of Variances		Levene's Test for Equality of Variances
											F	Sig.	t	df	Sig.（2-tailed）	Mean Difference	Std.Error Difference	95% Confidence Interval of the Difference
																		lower	Upper
									MIHA and Huh 7	Equal variances assumed	4.36792	0.104836	5.22263	4	0.00641592	0.478415	0.0916042	0.224081	0.732749
										Equal variances not assumed			5.22263	2.41922	0.0228579	0.478415	0.0916042	0.143005	0.813825

## Sheet: ME1
	ME1	GAPDH	ME1/GAPDH	MIHA	MHCC97H	Huh-7
MIHA 1	3513.69	50637.4	0.0693892	0.0693892	0.921602	0.449629		Tests of Normality
MHCC97H 1	45326.8	49182.6	0.921602	0.153911	0.856033	0.705652			Shapiro-Wilk
Huh-7 1	25606.9	56951.3	0.449629	0.0408053	0.843489	0.648738			Sta.	df	Sig.
MIHA 2	8680.85	56401.9	0.153911					MIHA	0.924616	3	0.468803
MHCC97H 2	44305.8	51757.1	0.856033					MHCC97H	0.866853	3	0.286633
Huh-7 2	40124.6	56861.8	0.705652					Huh7	0.906763	3	0.407363
MIHA 3	2393.98	58668.5	0.0408053
MHCC97H 3	45755.6	54245.7	0.843489
Huh-7 3	39535.6	60942.3	0.648738
								Indepentent Samples Test
										Levene's Test for Equality of Variances		Levene's Test for Equality of Variances
										F	Sig.	t	df	Sig.（2-tailed）	Mean Difference	Std.Error Difference	95% Confidence Interval of the Difference
																	lower	Upper
								MIHA and MHCC97H	Equal variances assumed	0.54134	0.502692	-18.8374	4	4.67679e-05	-0.785673	0.0417081	-0.901473	-0.669873
									Equal variances not assumed			-18.8374	3.61657	9.65894e-05	-0.785673	0.0417081	-0.906479	-0.664866
								Indepentent Samples Test
										Levene's Test for Equality of Variances		Levene's Test for Equality of Variances
										F	Sig.	t	df	Sig.（2-tailed）	Mean Difference	Std.Error Difference	95% Confidence Interval of the Difference
																	lower	Upper
								MIHA and Huh 7	Equal variances assumed	2.98255	0.159239	-6.05905	4	0.00374554	-0.513305	0.0847171	-0.748517	-0.278092
									Equal variances not assumed			-6.05905	2.73854	0.0116658	-0.513305	0.0847171	-0.798075	-0.228534

## Sheet: ACAT1
	ACAT1	GAPDH	ACAT1/GAPDH	MIHA	MHCC97H	Huh7
MIHA 1	43548.2	53246.8	0.817855	0.817855	0.650931	0.750795		Tests of Normality
MHCC97H 1	32727.5	50278	0.650931	0.797194	0.501391	0.526919			Shapiro-Wilk
Huh-7 1	34498.9	45949.8	0.750795	0.858002	0.705609	0.496668			Sta.	df	Sig.
MIHA 2	39435.1	49467.4	0.797194					MIHA	0.966901	3	0.650592
MHCC97H 2	26283.6	52421.3	0.501391					MHCC97H	0.932902	3	0.499577
Huh-7 2	29394.2	55785	0.526919					Huh7	0.837866	3	0.208517
MIHA 3	41882.9	48814.4	0.858002
MHCC97H 3	35867.1	50831.4	0.705609
Huh-7 3	29975.8	60353.7	0.496668					Indepentent Samples Test
										Levene's Test for Equality of Variances		Levene's Test for Equality of Variances
										F	Sig.	t	df	Sig.（2-tailed）	Mean Difference	Std.Error Difference	95% Confidence Interval of the Difference
																	lower	Upper
								MIHA and MHCC97H	Equal variances assumed	4.49305	0.101378	3.22427	4	0.03215	0.20504	0.0635928	0.0284781	0.381602
									Equal variances not assumed			3.22427	2.33969	0.0683108	0.20504	0.0635928	-0.0338228	0.443903
								Indepentent Samples Test
										Levene's Test for Equality of Variances		Levene's Test for Equality of Variances
										F	Sig.	t	df	Sig.（2-tailed）	Mean Difference	Std.Error Difference	95% Confidence Interval of the Difference
																	lower	Upper
								MIHA and Huh 7	Equal variances assumed	8.27405	0.0451735	2.83636	4	0.0470407	0.232889	0.0821085	0.0049196	0.460859
									Equal variances not assumed			2.83636	2.19797	0.0944136	0.232889	0.0821085	-0.0915872	0.557366

## Sheet: ELOVL1
	ELOVL1	GAPDH	ELOVL1/GAPDH		MIHA	MHCC97H	Huh-7
MIHA 1	24674.5	43197.6	0.571201		0.571201	1.05605	0.694963		Tests of Normality
MHCC97H 1	45834.2	43401.4	1.05605		0.444801	1.06673	0.768573			Shapiro-Wilk
Huh-7 1	37149.9	53456	0.694963		0.405384	1.13648	0.763285			Sta.	df	Sig.
MIHA 2	22299.5	50133.8	0.444801						MIHA	0.91598	3	0.438344
MHCC97H 2	50316.5	47168.8	1.06673						MHCC97H	0.847614	3	0.23409
Huh-7 2	43352.8	56407	0.768573						Huh7	0.803577	3	0.123068
MIHA 3	12944.2	31930.7	0.405384
MHCC97H 3	49534.3	43585.9	1.13648
Huh-7 3	40482.7	53037.5	0.763285
									Indepentent Samples Test
											Levene's Test for Equality of Variances		Levene's Test for Equality of Variances
											F	Sig.	t	df	Sig.（2-tailed）	Mean Difference	Std.Error Difference	95% Confidence Interval of the Difference
																		lower	Upper
									MIHA and MHCC97H	Equal variances assumed	2.11041	0.219953	-10.9374	4	0.000396896	-0.612625	0.0560121	-0.76814	-0.457111
										Equal variances not assumed			-10.9374	2.95517	0.0017506	-0.612625	0.0560121	-0.79242	-0.43283
									Indepentent Samples Test
											Levene's Test for Equality of Variances		Levene's Test for Equality of Variances
											F	Sig.	t	df	Sig.（2-tailed）	Mean Difference	Std.Error Difference	95% Confidence Interval of the Difference
																		lower	Upper
									MIHA and Huh 7	Equal variances assumed	2.43775	0.193471	-4.85079	4	0.00833465	-0.268478	0.0553474	-0.422147	-0.11481
										Equal variances not assumed			-4.85079	2.85537	0.0187278	-0.268478	0.0553474	-0.449775	-0.0871819

## Sheet: SMS
	SMS	GAPDH	SMS/GAPDH		MIHA	MHCC97H	Huh-7
MIHA 1	16353.2	54563.2	0.299711		0.299711	0.988212	0.70585
MHCC97H 1	55278	55937.4	0.988212		0.37843	1.19665	1.3282		Tests of Normality
Huh-7 1	44341.7	62820.2	0.70585		0.477734	0.926122	0.855245			Shapiro-Wilk
MIHA 2	20323.6	53705.1	0.37843							Sta.	df	Sig.
MHCC97H 2	47118.5	39375.2	1.19665						MIHA	0.995563	3	0.872692
Huh-7 2	51416.2	38711.3	1.3282						MHCC97H	0.911118	3	0.421822
MIHA 3	28821.9	60330.5	0.477734						Huh7	0.917349	3	0.443074
MHCC97H 3	50141.2	54141	0.926122
Huh-7 3	44244.3	51732.9	0.855245
									Indepentent Samples Test
											Levene's Test for Equality of Variances		Levene's Test for Equality of Variances
											F	Sig.	t	df	Sig.（2-tailed）	Mean Difference	Std.Error Difference	95% Confidence Interval of the Difference
																		lower	Upper
									MIHA and MHCC97H	Equal variances assumed	1.12607	0.348437	-6.74098	4	0.00252398	-0.651703	0.0966778	-0.920124	-0.383283
										Equal variances not assumed			-6.74098	3.37004	0.00456983	-0.651703	0.0966778	-0.941119	-0.362288
									Indepentent Samples Test
											Levene's Test for Equality of Variances		Levene's Test for Equality of Variances
											F	Sig.	t	df	Sig.（2-tailed）	Mean Difference	Std.Error Difference	95% Confidence Interval of the Difference
																		lower	Upper
									MIHA and Huh 7	Equal variances assumed	5.23095	0.0841229	-2.97046	4	0.0411257	-0.577805	0.194517	-1.11787	-0.0377385
										Equal variances not assumed			-2.97046	2.29988	0.0820543	-0.577805	0.194517	-1.31839	0.162784

## Sheet: UGDH
	UGDH	GAPDH	UGDH/GAPDH	MIHA	MHCC97H	Huh-7
MIHA 1	9178.79	16193.3	0.566825	0.566825	1.07599	0.84822			Tests of Normality
MHCC97H 1	16933.3	15737.4	1.07599	0.402907	1.05156	0.918282				Shapiro-Wilk
Huh-7 1	16824.6	19835.2	0.84822	0.458154	0.88912	1.02962				Sta.	df	Sig.
MIHA 2	4976.55	12351.6	0.402907						MIHA	0.965804	3	0.644781
MHCC97H 2	16287	15488.4	1.05156						MHCC97H	0.846174	3	0.23027
Huh-7 2	13663.3	14879.2	0.918282						Huh7	0.983032	3	0.75051
MIHA 3	24395.3	53246.8	0.458154
MHCC97H 3	44703.2	50278	0.88912						Indepentent Samples Test
Huh-7 3	47311	45949.8	1.02962								Levene's Test for Equality of Variances		Levene's Test for Equality of Variances
											F	Sig.	t	df	Sig.（2-tailed）	Mean Difference	Std.Error Difference	95% Confidence Interval of the Difference
																		lower	Upper
									MIHA and MHCC97H	Equal variances assumed	0.319373	0.602175	-6.97954	4	0.0022163	-0.529594	0.075878	-0.740265	-0.318923
										Equal variances not assumed			-6.97954	3.85398	0.00254175	-0.529594	0.075878	-0.743451	-0.315737
									Indepentent Samples Test
											Levene's Test for Equality of Variances		Levene's Test for Equality of Variances
											F	Sig.	t	df	Sig.（2-tailed）	Mean Difference	Std.Error Difference	95% Confidence Interval of the Difference
																		lower	Upper
									MIHA and Huh 7	Equal variances assumed	0.0173361	0.901605	-6.38138	4	0.00309414	-0.45608	0.0714704	-0.654514	-0.257646
										Equal variances not assumed			-6.38138	3.96625	0.00318462	-0.45608	0.0714704	-0.655181	-0.256978

## Sheet: ADSL
	ADSL	GAPDH	ADSL/GAPDH		MIHA	MHCC97H	Huh-7
MIHA 1	37315.2	51725.2	0.721412		0.721412	0.883636	0.96768		Tests of Normality
MHCC97H 1	44320.3	50156.8	0.883636		0.748988	0.984339	0.980535			Shapiro-Wilk
Huh-7 1	45753.2	47281.3	0.96768		0.562041	0.940826	0.729725			Sta.	df	Sig.
MIHA 2	32958.1	44003.5	0.748988						MIHA	0.857878	3	0.261753
MHCC97H 2	44138.5	44840.7	0.984339						MHCC97H	0.993888	3	0.850541
Huh-7 2	48748.3	49716	0.980535						Huh7	0.788333	3	0.0869408
MIHA 3	33138.6	58961.1	0.562041
MHCC97H 3	44265.8	47049.9	0.940826
Huh-7 3	39666.5	54358.2	0.729725						Indepentent Samples Test
											Levene's Test for Equality of Variances		Levene's Test for Equality of Variances
											F	Sig.	t	df	Sig.（2-tailed）	Mean Difference	Std.Error Difference	95% Confidence Interval of the Difference
																		lower	Upper
									MIHA and MHCC97H	Equal variances assumed	2.62357	0.180602	-3.97183	4	0.0165134	-0.258787	0.0651555	-0.439687	-0.0778862
										Equal variances not assumed			-3.97183	2.94271	0.0295613	-0.258787	0.0651555	-0.468443	-0.0491304
									Indepentent Samples Test
											Levene's Test for Equality of Variances		Levene's Test for Equality of Variances
											F	Sig.	t	df	Sig.（2-tailed）	Mean Difference	Std.Error Difference	95% Confidence Interval of the Difference
																		lower	Upper
									MIHA and Huh 7	Equal variances assumed	0.845853	0.409772	-2.14688	4	0.098325	-0.215166	0.100223	-0.493429	0.0630964
										Equal variances not assumed			-2.14688	3.61993	0.105523	-0.215166	0.100223	-0.505338	0.0750059

[truncated: 2 more sheets: HSP90AA1, S100A10]
